# Supplementary material for: Identification of a highly promiscuous glucosyltransferase from Penstemon barbatus for natural product glycodiversification
Source: Royal Society of Chemistry journal article supplement (doi:10.1039/d3ob00370a), 2023-01-01
Supplement: d3ob00370a1.pdf [file d3ob00370a1.pdf]

## Electronic Supplementary Information

### Identification of a Highly Promiscuous Glucosyltransferase from *Penstemon barbatus* for natural product glycodiversification

Yanan Wu,<sup>a, b, c, †</sup> Yihan Yang,<sup>b, c, †</sup> Liping Du,<sup>a</sup> Yibin Zhuang,<sup>b, c, \*</sup> and Tao Liu<sup>b, c, \*</sup>

<sup>a</sup> Tianjin Key Laboratory of Industrial Microbiology, College of Biotechnology, Tianjin University of Science and Technology, Tianjin 300457, China.

<sup>b</sup> Key Laboratory of Engineering Biology for Low-Carbon Manufacturing, Tianjin Institute of Industrial Biotechnology, Chinese Academy of Sciences, Tianjin 300308, China.

<sup>c</sup> National Center of Technology Innovation for Synthetic Biology, Tianjin 300308, China.

† These authors contributed equally to this work.

\* Corresponding authors.

Tel: +86 22 24828718; fax: +86 22 24828718. E-mail: [liu\\_t@tib.cas.cn](mailto:liu_t@tib.cas.cn)

Tel: +86 22 24828719; fax: +86 22 24828719. E-mail: [zhuang\\_yb@tib.cas.cn](mailto:zhuang_yb@tib.cas.cn).

## Table of Contents

|                                                                                                                                                                                                        |               |
|--------------------------------------------------------------------------------------------------------------------------------------------------------------------------------------------------------|---------------|
| <b>1. Supplementary Tables</b> .....                                                                                                                                                                   | <b>S4-S7</b>  |
| <b>Table S1.</b> Information of 10 candidates and 6His-MBP tag.....                                                                                                                                    | S4            |
| <b>Table S2.</b> Primers used in this study.....                                                                                                                                                       | S4            |
| <b>Table S3.</b> Information of all tested compounds catalyzed by UGT84A95.....                                                                                                                        | S5            |
| <b>Table S4.</b> HPLC conditions used in this study.....                                                                                                                                               | S5            |
| <b>Table S5.</b> Information of large-scale reactions and purification.....                                                                                                                            | S6            |
| <b>Table S6.</b> The sugar donor specificity of UGT84A95.....                                                                                                                                          | S6            |
| <b>Table S7.</b> Information of reported plant UGTs with characterized functions that are used for the phylogenetic analysis in this study.....                                                        | S7            |
| <b>2. Supplementary Figures</b> .....                                                                                                                                                                  | <b>S8-S39</b> |
| <b>Figure S1.</b> SDS-PAGE analysis of expression of His-MBP-UGT84A95 fusion protein.....                                                                                                              | S8            |
| <b>Figure S2.</b> The phylogenetic relationships between UGT84A95 and the reported plant UGTs with characterized functions.....                                                                        | S8            |
| <b>Figure S3.</b> The compounds are not accepted by UGT84A95.....                                                                                                                                      | S9            |
| <b>Figure S4-S8.</b> HPLC and LC-HRMS analysis of UGT84A95 catalytic reaction mixtures for compound <b>3-7</b> .....                                                                                   | S9-11         |
| <b>Figure S9-S29.</b> HPLC and LC-HRMS analysis of UGT84A95 catalytic reaction mixtures for compound <b>8-28</b> .....                                                                                 | S12-S22       |
| <b>Figure S30.</b> HPLC analysis of UGT84A95 catalytic reactions for compound <b>2</b> and <b>2'</b> .....                                                                                             | S23           |
| <b>Figure S31.</b> Determination of kinetic parameters ( $K_m$ and $V_{max}$ values) for purified UGT84A95 Using UDP-Glc as a sugar donor and <b>2, 5, 8, 14</b> as sugar acceptors, respectively..... | S23           |
| <b>Figure S32.</b> Structures of sugar donor in this study.....                                                                                                                                        | S23           |
| <b>Figure S33.</b> HPLC and LC-HRMS analysis of UGT84A95 catalytic reaction mixtures using different sugar donors and using <b>2</b> as the acceptor.....                                              | S24           |
| <b>Figure S34.</b> HPLC and LC-HRMS analysis of UGT84A95 catalytic reaction mixtures using different sugar donors and using <b>8</b> as the acceptor.....                                              | S24           |
| <b>Figure S35</b> HPLC and LC-HRMS analysis of UGT84A95 catalytic reaction mixtures using different sugar donors and using <b>14</b> as the acceptor.....                                              | S25           |
| <b>Figure S36</b> HPLC and LC-HRMS analysis of UGT84A95 catalytic reaction mixtures using different sugar donors and using <b>21</b> as the acceptor.....                                              | S25           |
| <b>Figure S37-S40.</b> NMR spectrum of glycosylated product <b>1a</b> .....                                                                                                                            | S26-S27       |

|                                                                              |               |
|------------------------------------------------------------------------------|---------------|
| <b>Figure S41-S44.</b> NMR spectrum of glycosylated product <b>1b</b> .....  | S28-S29       |
| <b>Figure S45-S48.</b> NMR spectrum of glycosylated product <b>2a</b> .....  | S30-S31       |
| <b>Figure S49-S52.</b> NMR spectrum of glycosylated product <b>2b</b> .....  | S32-S33       |
| <b>Figure S53-S56.</b> NMR spectrum of glycosylated product <b>4a</b> .....  | S34-S35       |
| <b>Figure S57-S60.</b> NMR spectrum of glycosylated product <b>14a</b> ..... | S36-S37       |
| <b>Figure S61-S64.</b> NMR spectrum of glycosylated product <b>15a</b> ..... | S38-S39       |
| <b>3. Supplementary Note.</b> sequence of UGT84A95.....                      | <b>S40</b>    |
| <b>4. References</b> .....                                                   | <b>S41-42</b> |

## 1. Supplementary Tables

**Table S1.** Information of 10 candidates and 6His-MBP tag

| Name.    | ORF (bp) | amino acids | Molecular weight(kDa) | enzyme activity                                |
|----------|----------|-------------|-----------------------|------------------------------------------------|
| 45566    | 1374     | 457         | 50.9                  | $\beta$ 1 $\rightarrow$ 3 rhamnosyltransferase |
| 43462    | 1455     | 484         | 54.2                  | C-4'' OH glycosyltransferase                   |
| 51909    | 1338     | 445         | 50.4                  | No activity                                    |
| 54198    | 1428     | 475         | 54.4                  | No activity                                    |
| 43107    | 1371     | 456         | 50.8                  | No activity                                    |
| 57483    | 1365     | 454         | 51.3                  | No activity                                    |
| 56249    | 1371     | 456         | 51.5                  | No activity                                    |
| 56575    | 1425     | 474         | 52.1                  | No activity                                    |
| 49774    | 1377     | 458         | 51.8                  | No activity                                    |
| 50252    | 1284     | 427         | 47.3                  | No activity                                    |
| 6His-Mbp | 1188     | 396         | 43.5                  | No activity                                    |

**Table S2.** Primers used in this study

| Name        | Sequences (5'-3')                                            |
|-------------|--------------------------------------------------------------|
| MBP_45566_F | AATCCAATATTGGAAGTGAATGCCTGAATTACAAAAGTCATCAAAC               |
| MBP_45566_R | GGCGCTCGAATTCGGATCCGCTACAATTCATACAAATTCTGAATAAACTATCAATG     |
| MBP_43462_F | AATCCAATATTGGAAGTGAATGACCGCTGCAGAGAAAAACAC                   |
| MBP_43462_R | GGCGCTCGAATTCGGATCCGCTAGATTATTGTATGATCGGTTCTATCCGG           |
| MBP_51909_F | AATCCAATATTGGAAGTGAATGGAATCAAATCTATTTTCAGAGTTCTAATG          |
| MBP_51909_R | GGCGCTCGAATTCGGATCCGTCATTCTTCATACAAATGTTTGACAACCTGC          |
| MBP_54198_F | AATCCAATATTGGAAGTGAATGTTGATAATTGTAAGAAAGAAACTAGCAAAG         |
| MBP_54198_R | GGCGCTCGAATTCGGATCCGCTACTTGTCTTCATACAAAGTTTCATTAGC           |
| MBP_43107_F | AATCCAATATTGGAAGTGGATGAATTTGATGATGAAGAAGAAGAAAATAATTTAATACC  |
| MBP_43107_R | GGCGCTCGAATTCGGATCCGTCAAATAAATTGAGAGAAAGTAGACATTGCTGTAG      |
| MBP_57483_F | AATCCAATATTGGAAGTGAATGGATAATCAAGGTACAACATCTGTTCTGC           |
| MBP_57483_R | GGCGCTCGAATTCGGATCCGTTAAGCAGTAGAAGATCTAAATGATGTAATAAAATCAACC |
| MBP_56249_F | AATCCAATATTGGAAGTGAATGGATACGGTGATAAAGAACCTACCC               |
| MBP_56249_R | GGCGCTCGAATTCGGATCCGTCATTAATGATGAAATATCTTTCAAAAAGAATCCAAG    |
| MBP_56575_F | AATCCAATATTGGAAGTGAATGTCAGACTCCGGCGCACACATC                  |
| MBP_56575_R | GGCGCTCGAATTCGGATCCGTCACATTAAACCTTTGTCCAATAAATCTTTGGTG       |
| MBP_49774_F | AATCCAATATTGGAAGTGAATGGACTACCATATTCTCAAGTAACATTCCAG          |
| MBP_49774_R | GGCGCTCGAATTCGGATCCGTTACCCTTGACAATGCCACCAAC                  |
| MBP_50252_F | AATCCAATATTGGAAGTGAATGGGGATGGAATTGGCTCGAGGG                  |
| MBP_50252_R | GGCGCTCGAATTCGGATCCGTTACGCCTCAACCAGTTCAACCTTTC               |
| T7          | TAATACGACTCACTATAGG                                          |
| T7t         | CAAAAACCCCTCAAGACCCGTTTAGAGGCCCAAGGGTTATGCTAG                |

**Table S3.** Information of all tested compounds catalyzed by UGT84A95.

| Type                | No. | Name                                             | Molecular formula                                | Molecular weight | CAS number  |
|---------------------|-----|--------------------------------------------------|--------------------------------------------------|------------------|-------------|
| PhGs                | 1   | Osmanthuside B                                   | C <sub>29</sub> H <sub>36</sub> O <sub>13</sub>  | 592.588          | 94492-23-6  |
|                     | 2   | Verbascoside                                     | C <sub>29</sub> H <sub>36</sub> O <sub>15</sub>  | 624.587          | 61276-17-3  |
|                     | 3   | Forsythoside A                                   | C <sub>29</sub> H <sub>36</sub> O <sub>15</sub>  | 624.587          | 79916-77-1  |
|                     | 4   | Forsythoside B                                   | C <sub>34</sub> H <sub>44</sub> O <sub>19</sub>  | 756.702          | 81525-13-5  |
|                     | 5   | Calceolarioside B                                | C <sub>23</sub> H <sub>26</sub> O <sub>11</sub>  | 478.446          | 105471-98-5 |
|                     | 6   | Calceolarioside A                                | C <sub>23</sub> H <sub>26</sub> O <sub>11</sub>  | 478.446          | 84744-28-5  |
|                     | 7   | Echinacoside                                     | C <sub>35</sub> H <sub>46</sub> O <sub>20</sub>  | 786.728          | 82854-37-3  |
| flavonoids          | 8   | Rutin                                            | C <sub>27</sub> H <sub>30</sub> O <sub>16</sub>  | 610.518          | 153-18-4    |
|                     | 9   | Quercetin                                        | C <sub>15</sub> H <sub>10</sub> O <sub>7</sub>   | 302.236          | 117-39-5    |
|                     | 10  | Icariin                                          | C <sub>33</sub> H <sub>40</sub> O <sub>15</sub>  | 676.662          | 489-32-7    |
|                     | 11  | Orientin                                         | C <sub>21</sub> H <sub>20</sub> O <sub>11</sub>  | 448.377          | 28608-75-5  |
|                     | 12  | Kaempferol                                       | C <sub>15</sub> H <sub>10</sub> O <sub>6</sub>   | 286.236          | 520-18-3    |
|                     | 13  | Eriodictyol                                      | C <sub>15</sub> H <sub>12</sub> O <sub>6</sub>   | 288.252          | 552-58-9    |
| terpenoids          | 14  | Picroside II                                     | C <sub>23</sub> H <sub>28</sub> O <sub>13</sub>  | 512.461          | 39012-20-9  |
|                     | 15  | Oleuropein                                       | C <sub>25</sub> H <sub>32</sub> O <sub>13</sub>  | 540.514          | 32619-42-4  |
|                     | 16  | Ginsenoside Re                                   | C <sub>48</sub> H <sub>82</sub> O <sub>18</sub>  | 947.154          | 52286-59-6  |
|                     | 17  | Ginsenoside Rg1                                  | C <sub>42</sub> H <sub>72</sub> O <sub>14</sub>  | 801.013          | 22427-39-0  |
| Stilbene glycosides | 18  | Paclitaxel                                       | C <sub>47</sub> H <sub>51</sub> NO <sub>14</sub> | 853.906          | 33069-62-4  |
|                     | 19  | 2,3,5,4'-Tetrahydroxy stilbene 2-O-β-D-glucoside | C <sub>20</sub> H <sub>22</sub> O <sub>9</sub>   | 406.383          | 82373-94-2  |
| coumarins           | 20  | alloysoimperatorin                               | C <sub>16</sub> H <sub>14</sub> O <sub>4</sub>   | 270.280          | 35214-83-6  |
|                     | 21  | Umbelliferone                                    | C <sub>9</sub> H <sub>6</sub> O <sub>3</sub>     | 162.142          | 93-35-6     |
|                     | 22  | Scopoletin                                       | C <sub>10</sub> H <sub>8</sub> O <sub>4</sub>    | 192.168          | 92-61-5     |
|                     | 23  | <u>Isoscopoletin</u>                             | C <sub>10</sub> H <sub>8</sub> O <sub>4</sub>    | 192.168          | 776-86-3    |
|                     | 24  | Esculetin                                        | C <sub>9</sub> H <sub>6</sub> O <sub>4</sub>     | 178.141          | 305-01-1    |
|                     | 25  | 7-demethylsuberosin                              | C <sub>14</sub> H <sub>14</sub> O <sub>3</sub>   | 230.259          | 21422-04-8  |
| simple polyphenols  | 26  | Caffeic acid                                     | C <sub>9</sub> H <sub>8</sub> O <sub>4</sub>     | 180.157          | 331-39-5    |
|                     | 27  | ferulic acid                                     | C <sub>10</sub> H <sub>10</sub> O <sub>4</sub>   | 194.184          | 1135-24-6   |
|                     | 28  | Resveratrol                                      | C <sub>14</sub> H <sub>12</sub> O <sub>3</sub>   | 228.243          | 501-36-0    |

**Table S4.** HPLC conditions used in this study.

| Method | Solvent A                                    | Solvent B    | Gradient Analysis                                                      | Substrates    |
|--------|----------------------------------------------|--------------|------------------------------------------------------------------------|---------------|
| A      | H <sub>2</sub> O containing 0.1% formic acid | Acetonitrile | 5% B, 5min; 5-13.2%B, 13min; 18-21.6%B, 25min; 100%B, 7min; 5%B, 7min. | 1, 2, 6, 7    |
| B      | H <sub>2</sub> O containing 0.1% formic acid | Acetonitrile | 5% B, 5min; 5-52.5%B, 20min; 100%B, 7min; 5%B, 7min.                   | 3, 4, 5, 8-28 |

**Table S5.** Information of large-scale reactions and purification.

| Substrate (No) | reaction volumes | Reaction time(h) | gradient conditions                                                | UV (nm) | product No. – Weight (mg)                          |
|----------------|------------------|------------------|--------------------------------------------------------------------|---------|----------------------------------------------------|
| 1              | 1mL×15           | 5                | 18% B, 5 min; 18-19.5% B, 15 min; 100 B, 10 min; 18% B, 10min;     | 312     | <b>1a</b> –5.5<br><b>1b</b> –3.2                   |
| 2              | 1mL×20           | 5                | 17.5% B, 5 min; 17.5-19% B, 15 min; 100 B, 10 min; 17.5% B, 10min; | 312     | <b>2a</b> –4.5<br><b>2b</b> –1.5                   |
| 3              | 1mL×15           | 5                | 15% B, 12 min; 100% B, 8 min; 15% B, 8 min;                        | 312     | <b>3a</b> –3.7                                     |
| 4              | 1mL×20           | 24               | 15% B, 12 min; 100% B, 8 min; 15% B, 8 min;                        | 312     | <b>4a</b> –3.3                                     |
| 5              | 1mL×15           | 5                | 16% B, 10 min; 16-16.5% B, 5 min; 100% B, 8 min; 16% B, 8 min;     | 312     | <b>5a</b> –3.9                                     |
| 8              | 1mL×15           | 5                | 15% B, 12 min; 100% B, 8 min; 15% B, 8 min;                        | 254     | <b>8a</b> –2.8                                     |
| 9              | 1mL×30           | 7                | 16% B, 7 min; 16-24% B, 20 min; 100% B, 8 min; 16% B, 8 min;       | 254     | <b>9b</b> –4.5<br><b>9c</b> –1.2<br><b>9d</b> –3.4 |
| 14             | 1mL×15           | 5                | 14% B, 10 min; 100% B, 8 min; 14% B, 8 min;                        | 254     | <b>14a</b> –6.5                                    |
| 15             | 1mL×40           | 24               | 18.5% B, 8min; 19% B, 13 min; 100% B, 8 min; 18.5% B, 8 min;       | 254     | <b>15a</b> –6.0                                    |

**Table S6.** The sugar donor specificity of UGT84A95. Different substrates (**2**, **8**, **14**, **21**) were selected as acceptor substrates. “√” means that the enzymatic reactions could be catalyzed by UGT84A95.

|           | UDP-Glc | UDP-GlcA | UDP-Xyl | UDP-Rha | UDP-GlcNAc | UDP-Gal |
|-----------|---------|----------|---------|---------|------------|---------|
| <b>2</b>  | √       |          |         |         |            |         |
| <b>8</b>  | √       |          | √       |         |            | √       |
| <b>14</b> | √       |          |         |         |            | √       |
| <b>21</b> | √       |          | √       |         |            | √       |

**Table S7.** Information of reported plant UGTs with characterized functions that are used for the phylogenetic analysis in this study.

| <b>Name</b>  | <b>Source</b>                                | <b>Genbank</b> | <b>Reference</b> |
|--------------|----------------------------------------------|----------------|------------------|
| FaGT2        | <i>Fragaria anana</i>                        | Q66PF4.1       | 1                |
| VLR5gt       | <i>Vitis labrusca</i>                        | ABH03018.1     | 2                |
| UGT84A77     | <i>Canarium album</i>                        | QZM06937.1     | 3                |
| UGT84A23     | <i>Punica granatum</i>                       | ANN02875.1     | 4                |
| UGT84A34     | <i>Nemophila menziesii</i>                   | BBA68563.1     | 5                |
| DcUSAGT1     | <i>Daucus carota</i>                         | AMC33112.1     | 6                |
| UGT84A33     | <i>Carthamus tinctorius</i>                  | AYW01718.1     | 7                |
| UGT84A9a     | <i>Gentiana triflora</i>                     | BAQ19550 .1    | 8                |
| UGT73A4      | <i>Beta vulgaris</i>                         | AAS94329       | 9                |
| UGT84F1      | <i>Medicago truncatula</i>                   | ABI94023.1     | 10               |
| UGT84F6      | <i>Glycyrrhiza uralensis</i>                 | QDM38904.1     | 11               |
| UGT84F9      | <i>Medicago truncatula</i>                   | XP_013470035.1 | 12               |
| GgSGT        | <i>Gomphrena globosa</i>                     | BAG14302.1     | 13               |
| UGT84A9      | <i>Brassica napus</i> var. <i>napus</i>      | CAS03354 .1    | 14               |
| UGT84A2      | <i>Arabidopsis thaliana</i>                  | NP_188793.1    | 15               |
| UGT84A1      | <i>Arabidopsis thaliana</i>                  | Q5XF20         | 15               |
| UGT84A57     | <i>Eutrema japonicum</i>                     | BBI55602.1     | 16               |
| UGT84B1      | <i>Arabidopsis thaliana</i>                  | NP_179907.1    | 17               |
| GAGT         | <i>Solanum lycopersicum</i>                  | CAI62049.1     | 18               |
| UGT74M1      | <i>Nicotiana tabacum</i>                     | AAF61647.1     | 19               |
| UGT74F2      | <i>Arabidopsis thaliana</i>                  | NP_181910.1    | 20               |
| PgUGT8       | <i>Panax ginseng</i>                         | AIE12488.1     | 21               |
| UGT74M1      | <i>Gypsophila vaccaria</i>                   | ABK76266       | 22               |
| LOC542250    | <i>Zea mays</i>                              | AAA59054       | 23               |
| UGT74H5      | <i>Avena strigosa</i>                        | ACD03250       | 24               |
| UGT74F11     | <i>Oryza sativa</i> Japonica Group           | 5TME           | 25               |
| HvUGT13248   | <i>Hordeum vulgare</i> subsp. <i>vulgare</i> | ADC92550       | 26               |
| Bradi5g03300 | <i>Brachypodium distachyon</i>               | PNT60691.1     | 27               |
| UGT723F9     | <i>Crocus sativus</i>                        | ACM66950.1     | 28               |
| UGT75C1      | <i>Arabidopsis thaliana</i>                  | AAL69494.1     | 29               |
| UGT75B1      | <i>Arabidopsis thaliana</i>                  | AEE27854       | 30               |
| UGT75D1      | <i>Arabidopsis thaliana</i>                  | AAB58497.1     | 15               |

## 2. Supplementary Figures

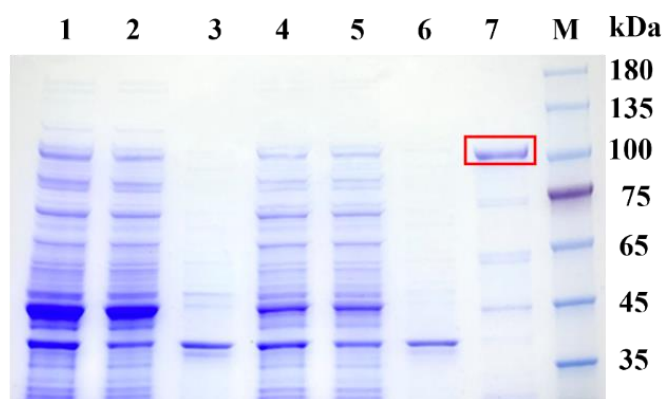

**Figure S1.** SDS-PAGE analysis of expression of His-MBP-UGT84A95 fusion protein.

Lane 1, 2 and 3: Cell lysate, Supernatant and Precipitation of His-MBP.

Lane 4, 5 and 6: Cell lysate, Supernatant and Precipitation of His-MBP-UGT84A95.

Lane 7: His-MBP-UGT84A95 purified by Ni-NTA affinity chromatography.

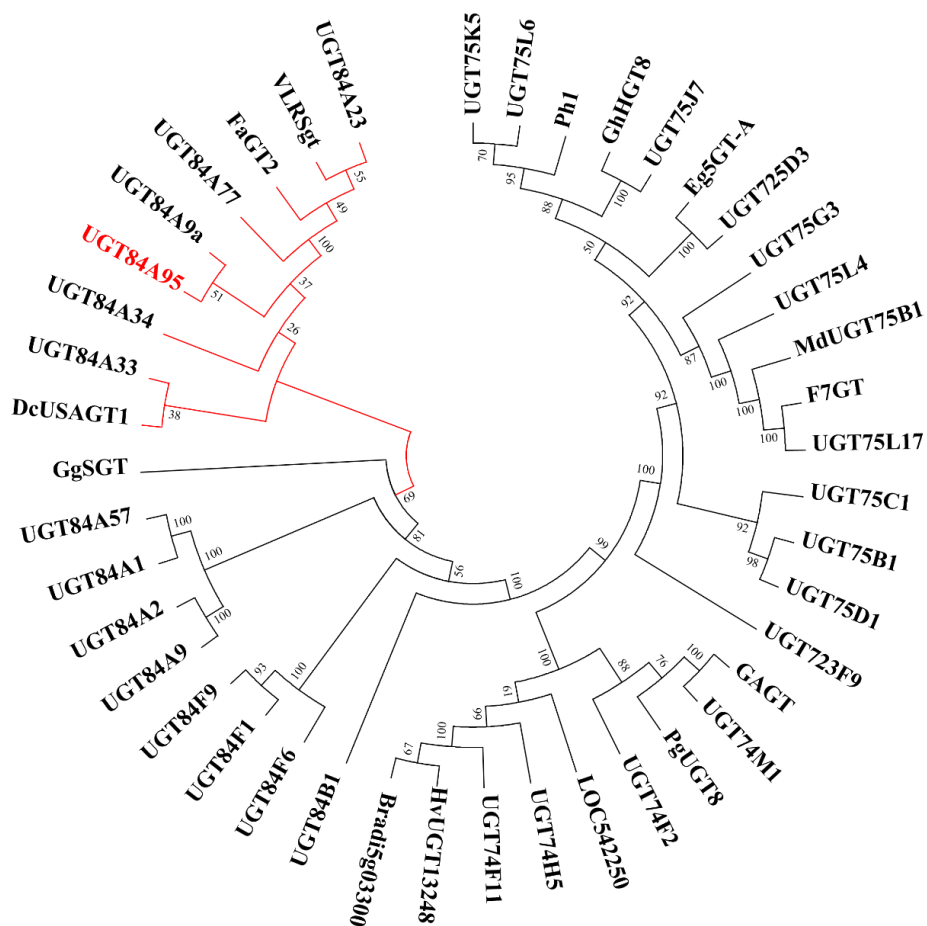

**Figure S2.** The phylogenetic relationships between UGT84A95 and the reported plant UGTs with characterized functions. The accession numbers of the sequences used in this study are shown in Table S6. The protein sequences were aligned using ClustalW. The neighbour-joining phylogenetic tree was drawn using MEGA 7. The bootstrap value was 1000, and the branch lengths represent the relative genetic distances.



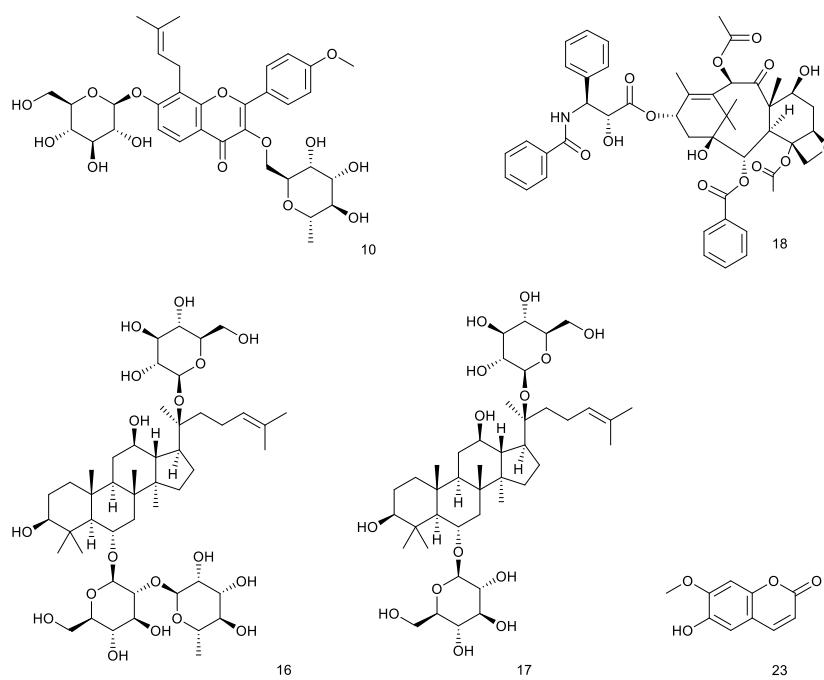

**Figure S3.** The compounds are not accepted by UGT84A95

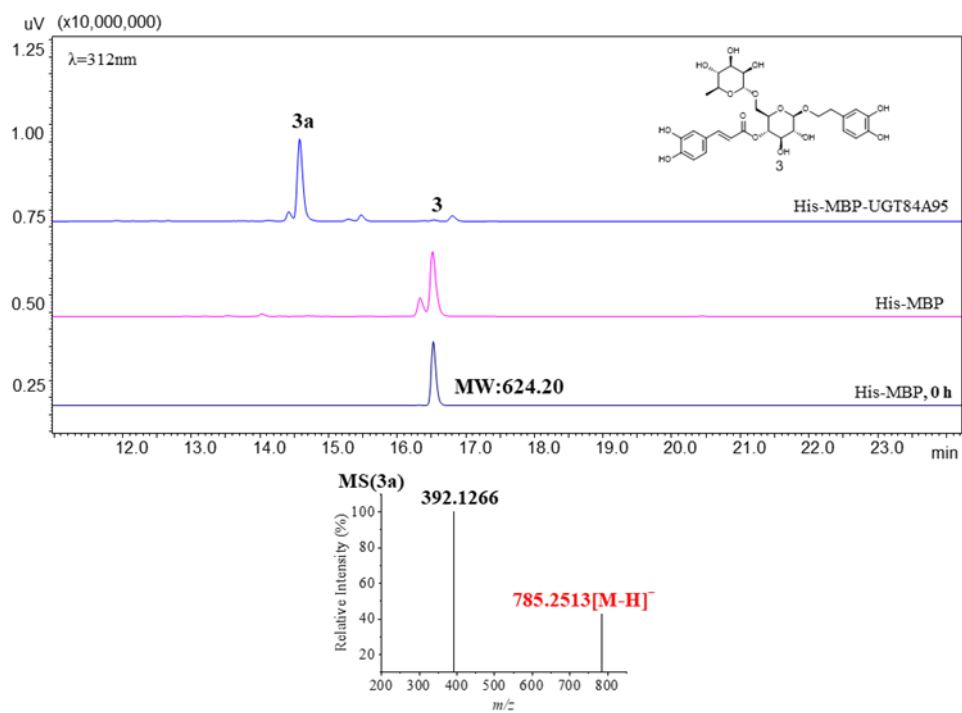

**Figure S4.** HPLC and LC-HRMS analysis of UGT84A95 catalytic reaction mixtures for compound 3.

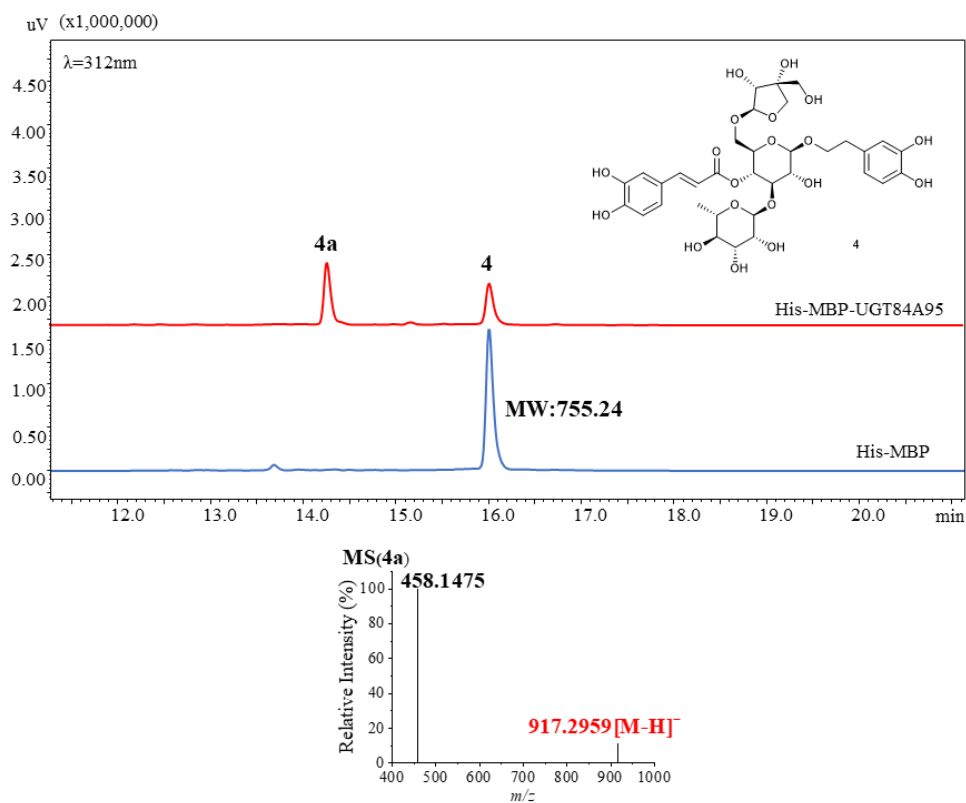

**Figure S5.** HPLC and LC-HRMS analysis of UGT84A95 catalytic reaction mixtures for compound 4.

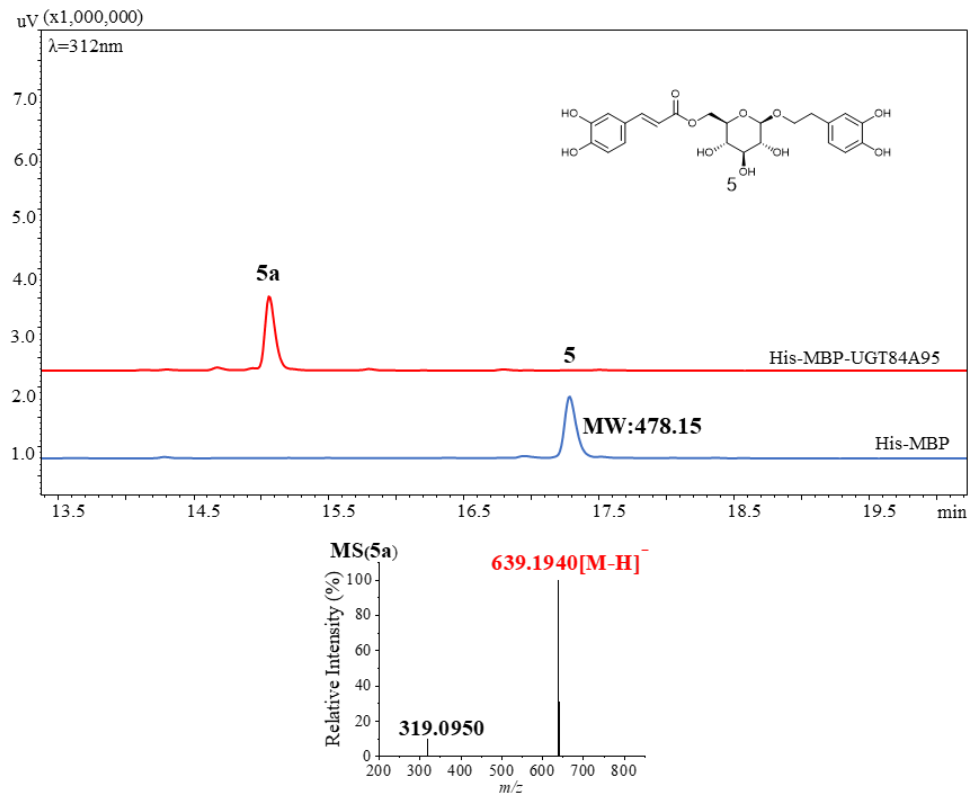

**Figure S6.** HPLC and LC-HRMS analysis of UGT84A95 catalytic reaction mixtures for compound 5.

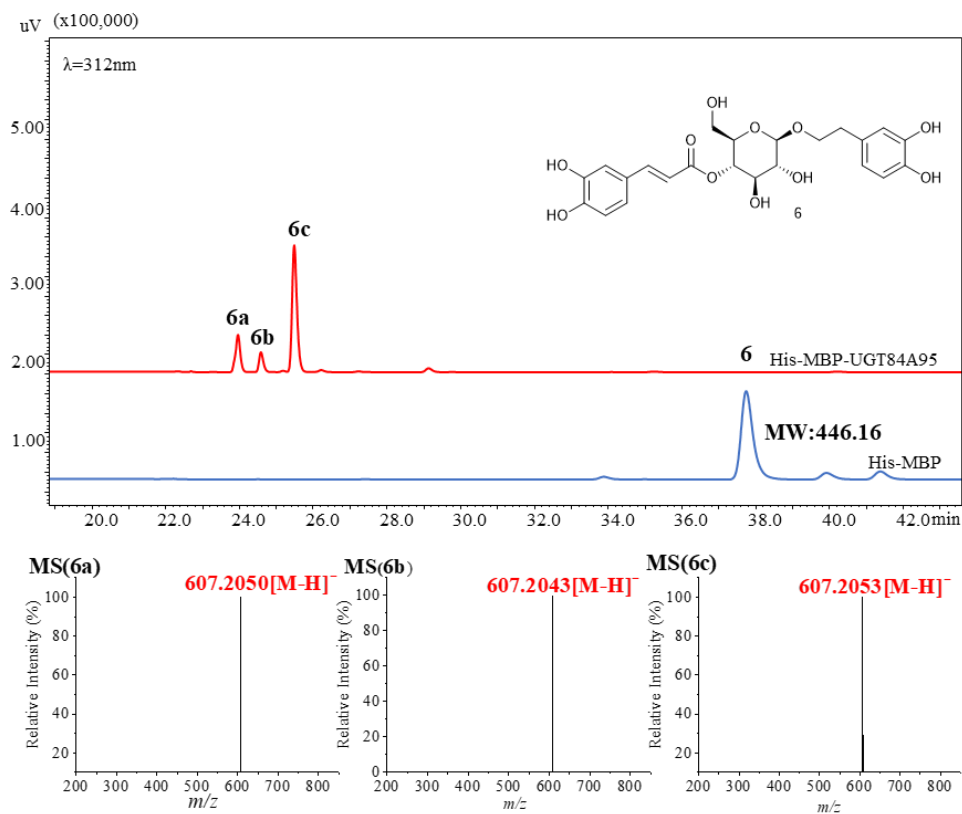

**Figure S7.** HPLC and LC-HRMS analysis of UGT84A95 catalytic reaction mixtures for compound 6.

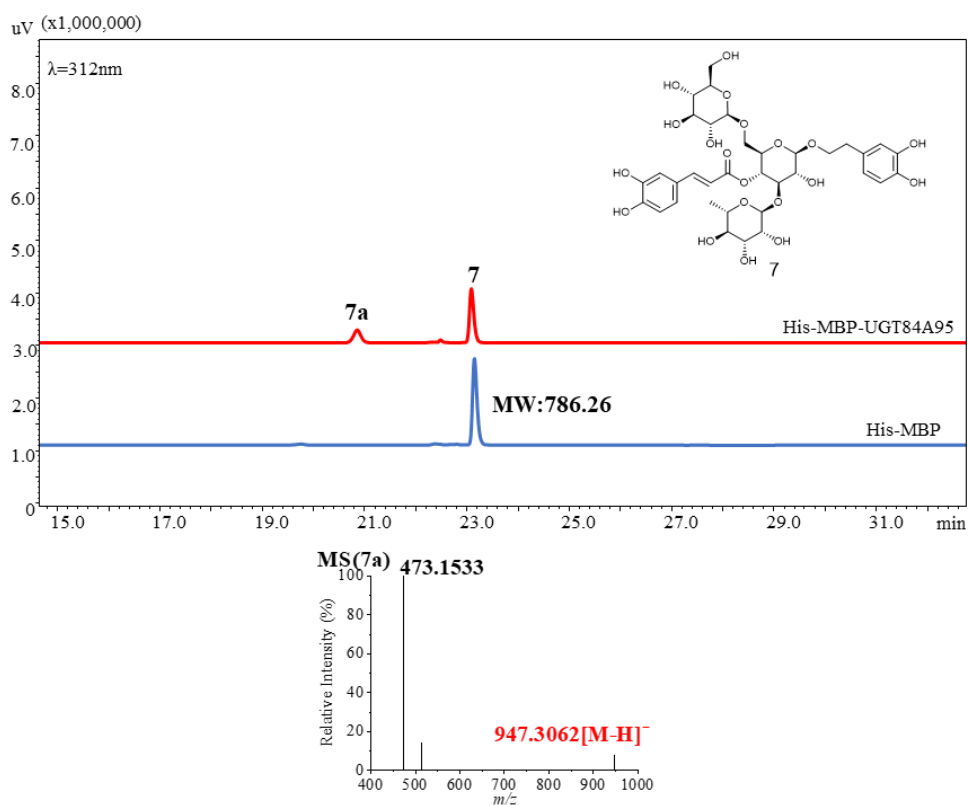

**Figure S8.** HPLC and LC-HRMS analysis of UGT84A95 catalytic reaction mixtures for compound 7.

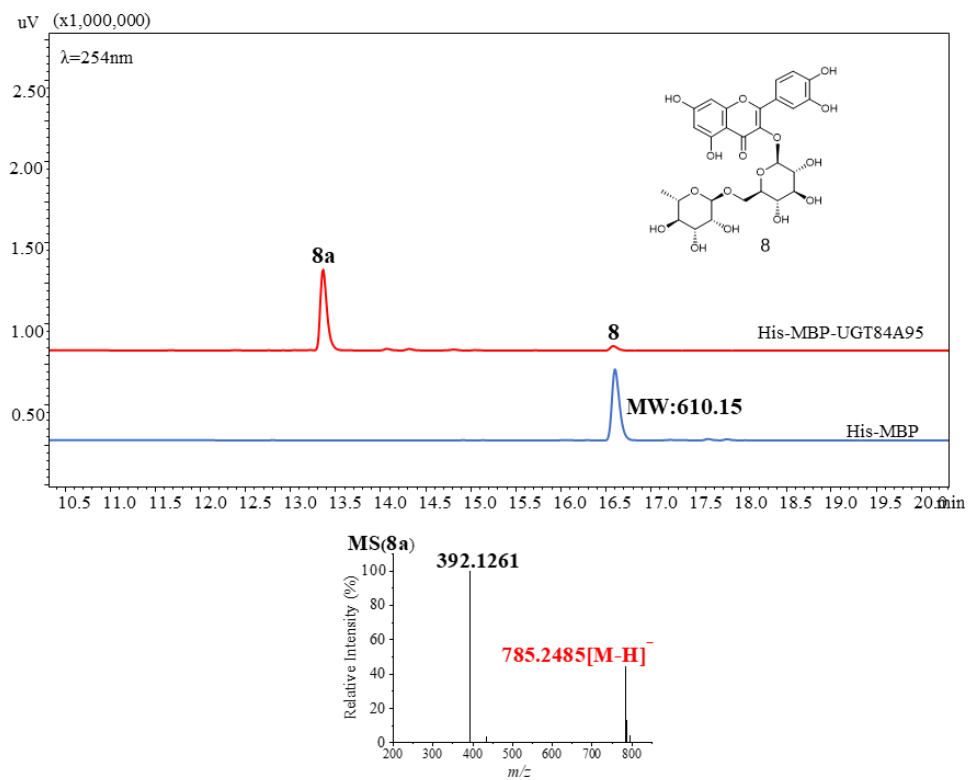

**Figure S9.** HPLC and LC-HRMS analysis of UGT84A95 catalytic reaction mixtures for compound **8**.

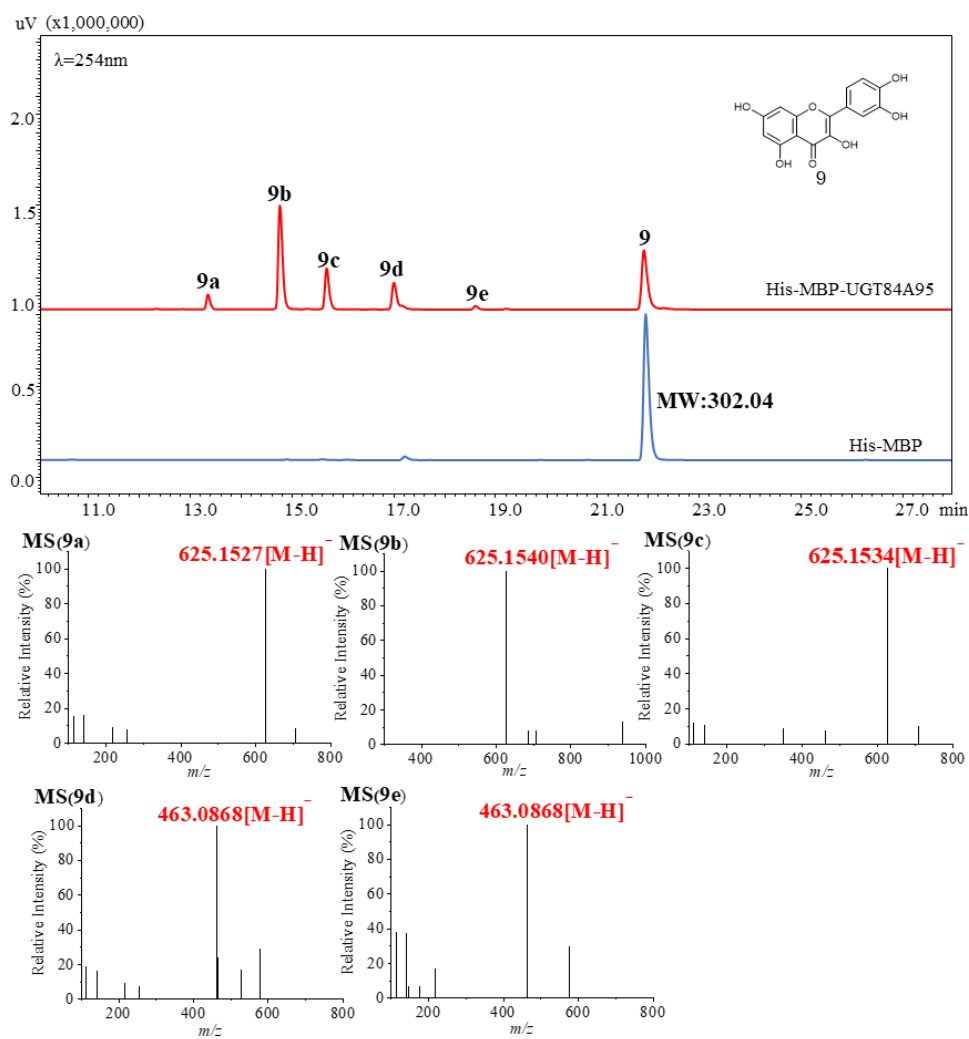

**Figure S10.** HPLC and LC-HRMS analysis of UGT84A95 catalytic reaction mixtures for compound **9**.

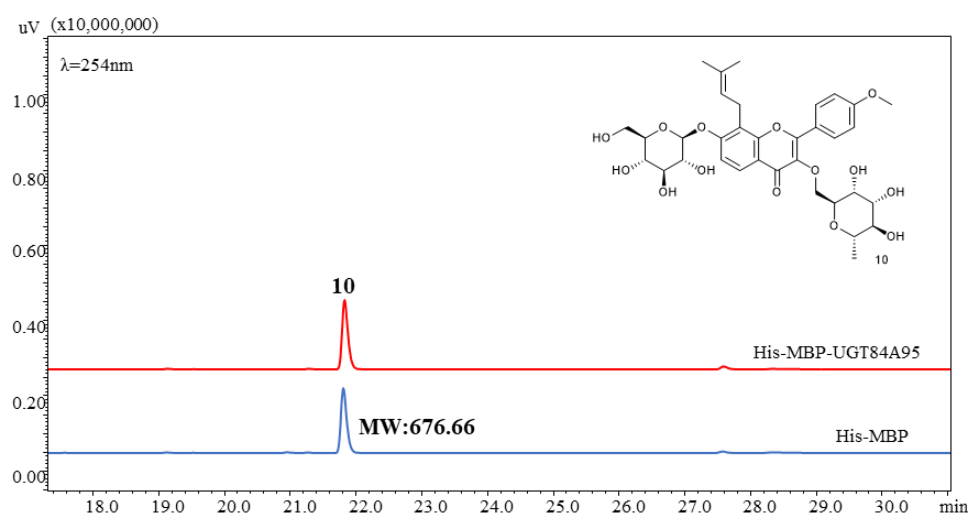

**Figure S11.** HPLC analysis of UGT84A95 catalytic reaction mixtures for compound **10**.

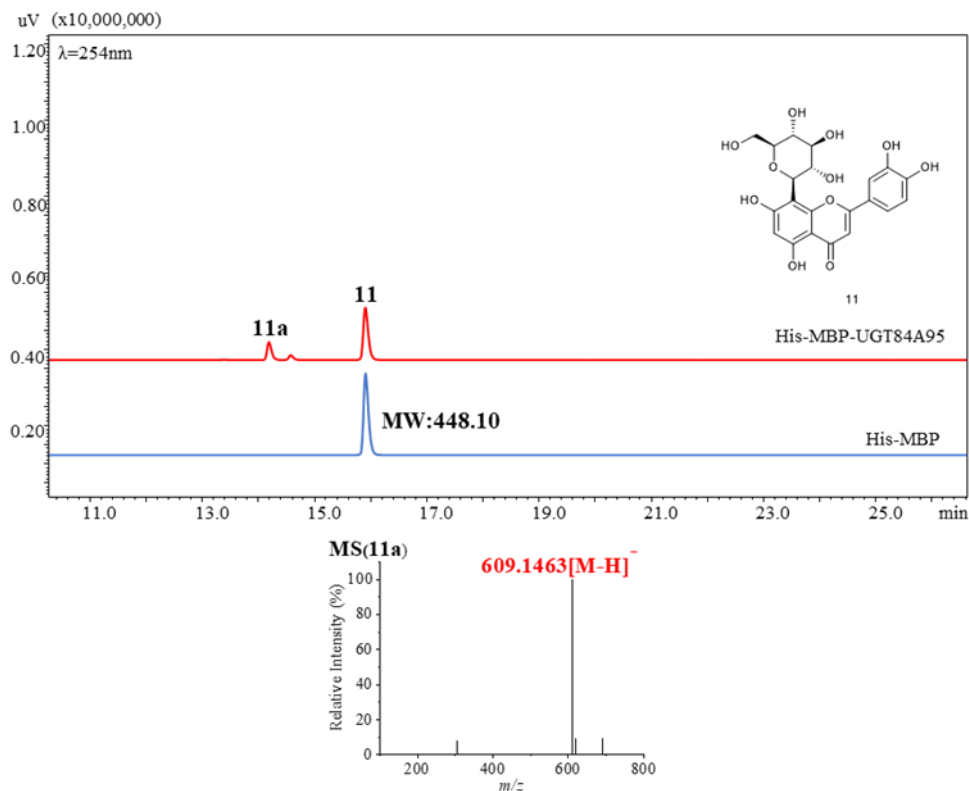

**Figure S12.** HPLC and LC-HRMS analysis of UGT84A95 catalytic reaction mixtures for compound **11**.

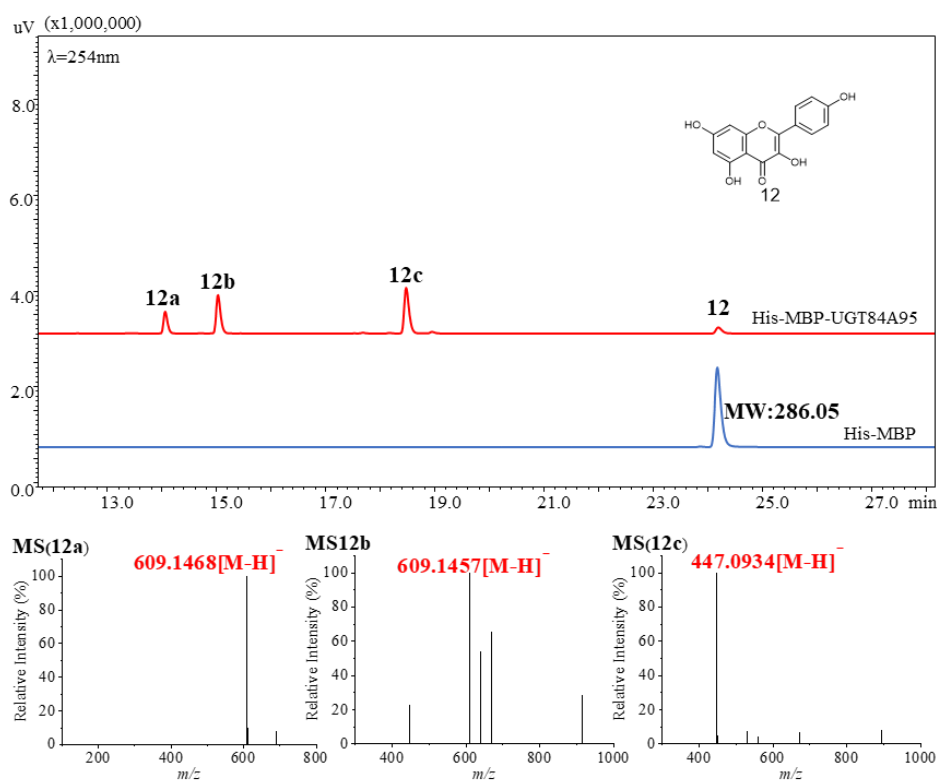

**Figure S13.** HPLC and LC-HRMS analysis of UGT84A95 catalytic reaction mixtures for compound **12**.

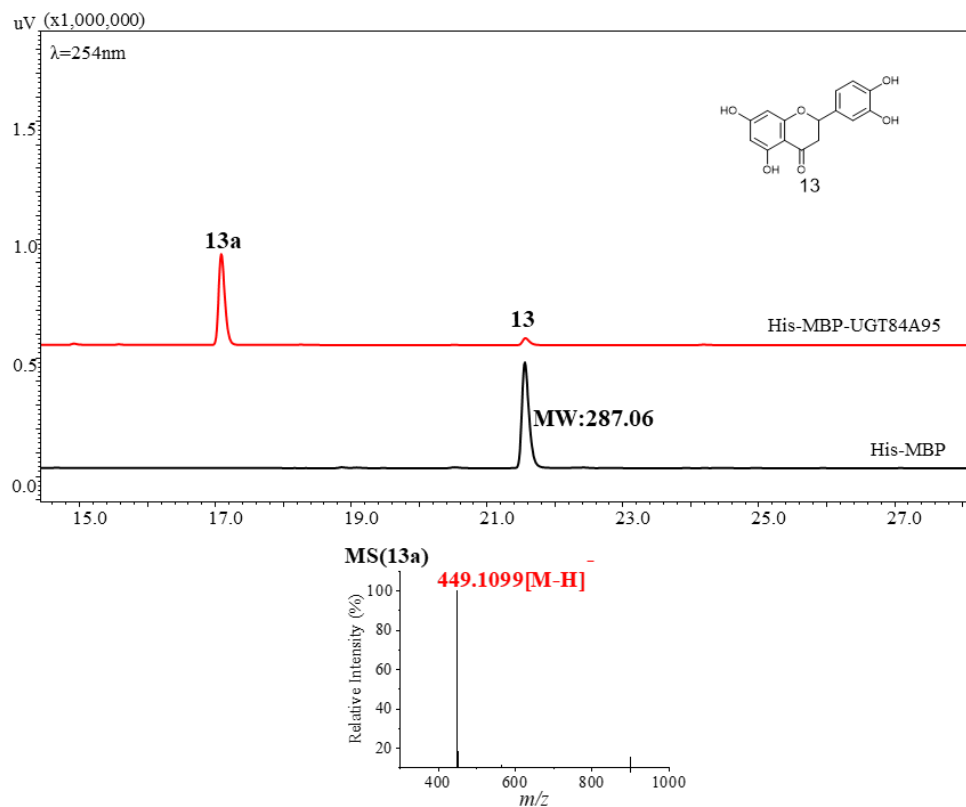

**Figure S14.** HPLC and LC-HRMS analysis of UGT84A95 catalytic reaction mixtures for compound **13**.

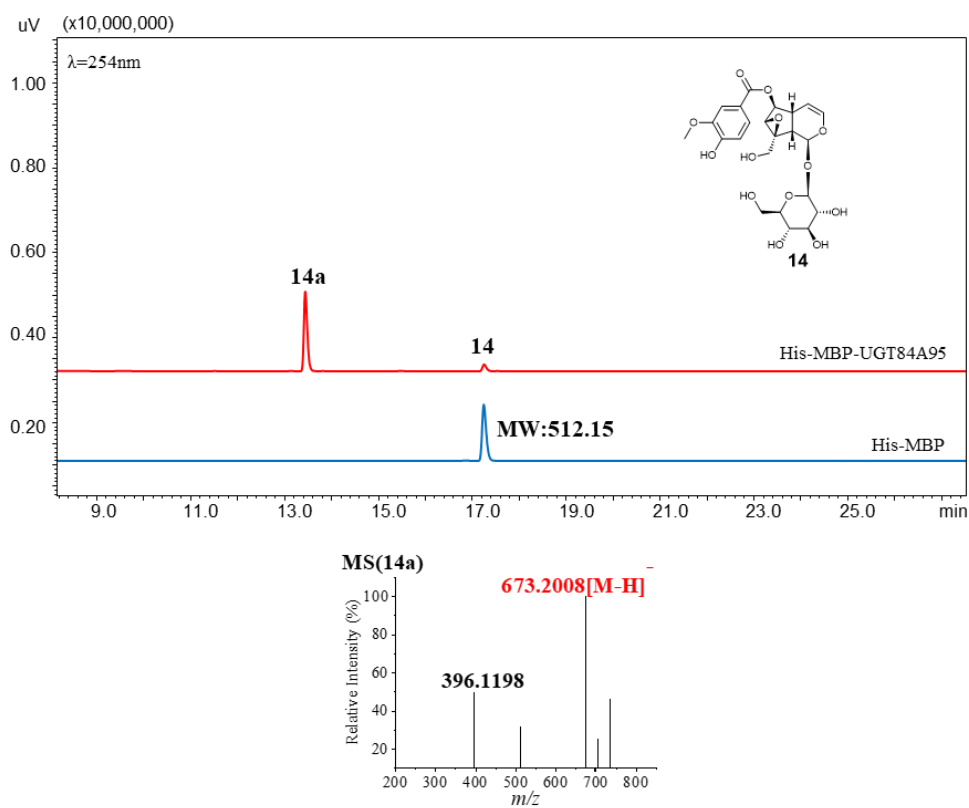

**Figure S15.** HPLC and LC-HRMS analysis of UGT84A95 catalytic reaction mixtures for compound **14**.

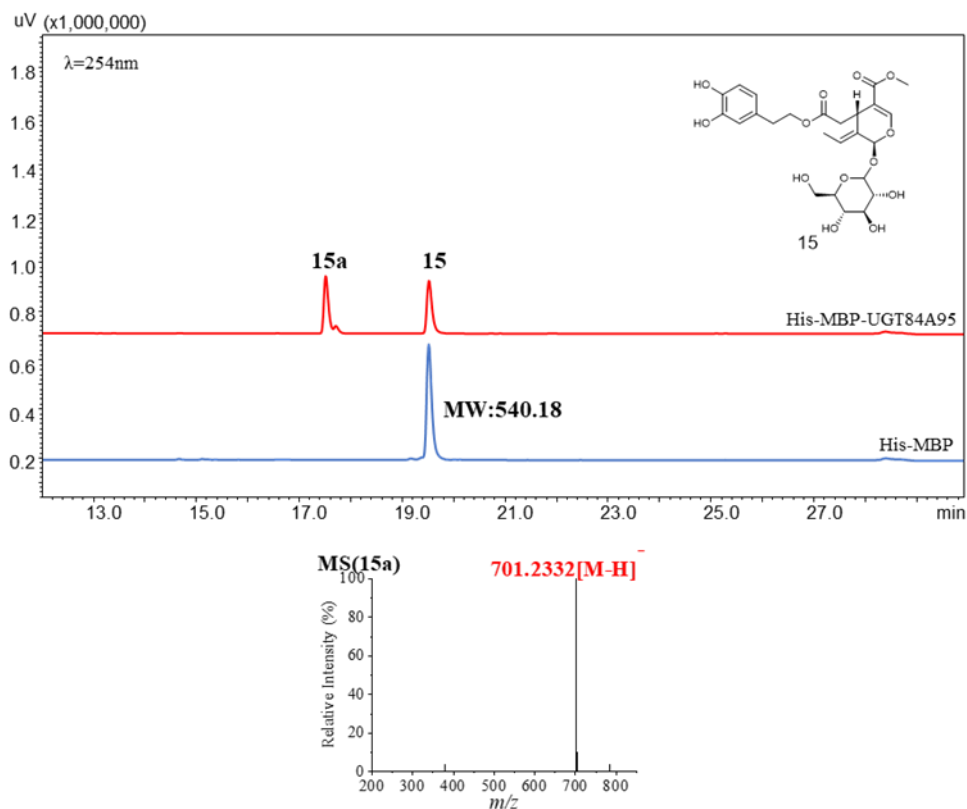

**Figure S16.** HPLC and LC-HRMS analysis of UGT84A95 catalytic reaction mixtures for compound 15.

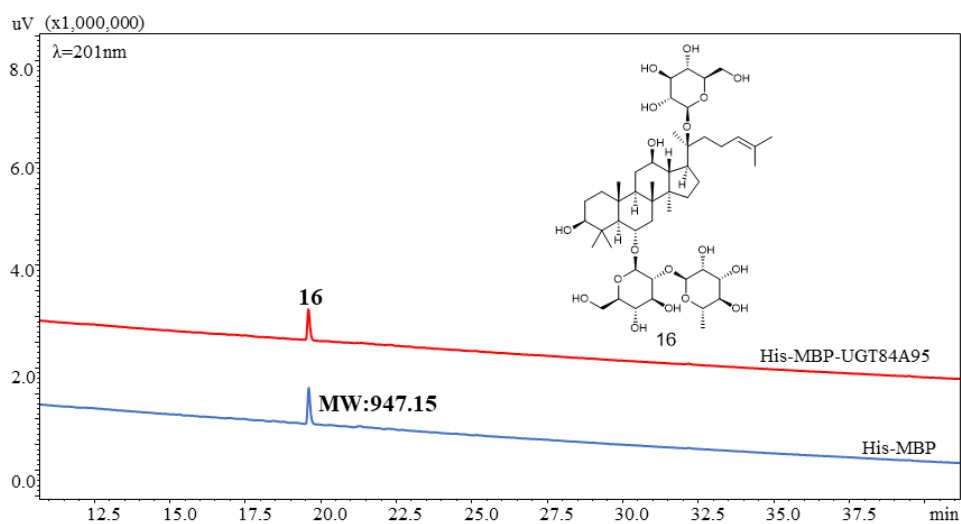

**Figure S17.** HPLC analysis of UGT84A95 catalytic reaction mixtures for compound 16.



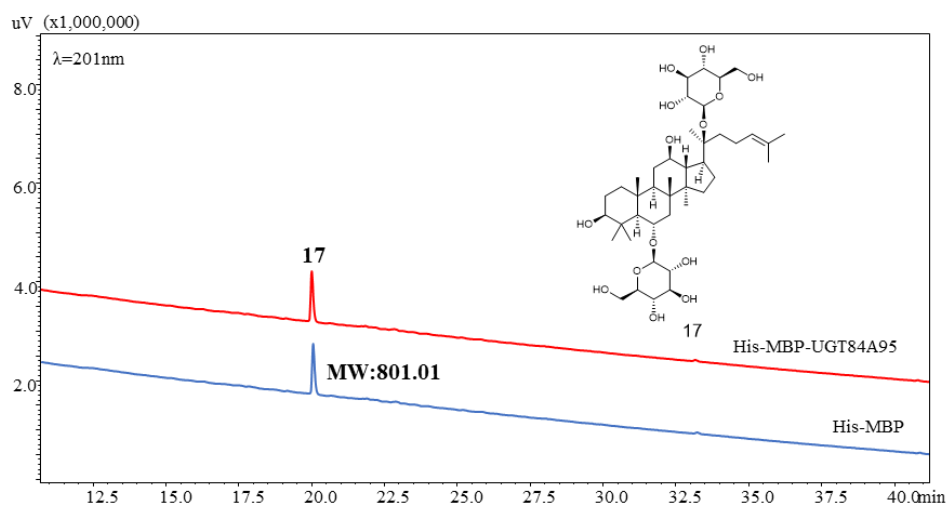

**Figure S18.** HPLC analysis of UGT84A95 catalytic reaction mixtures for compound **17**.

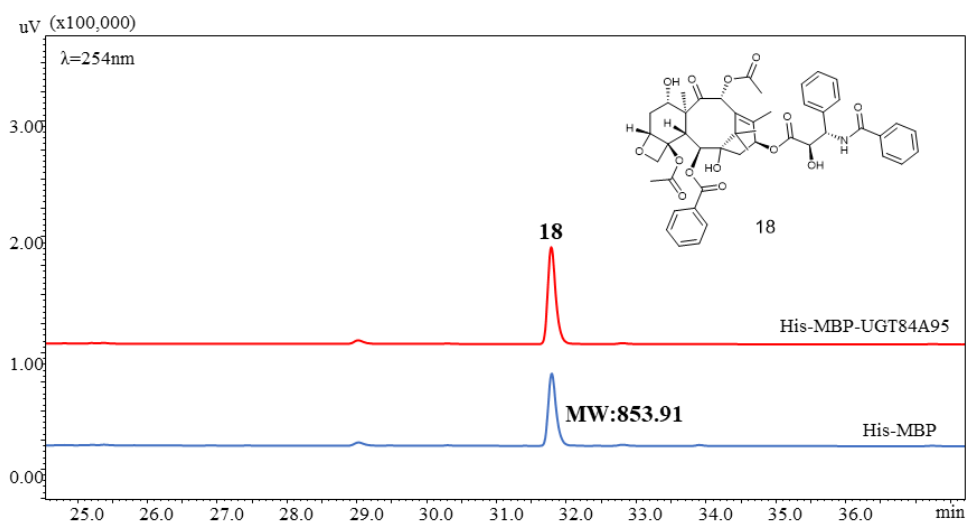

**Figure S19.** HPLC analysis of UGT84A95 catalytic reaction mixtures for compound **18**.

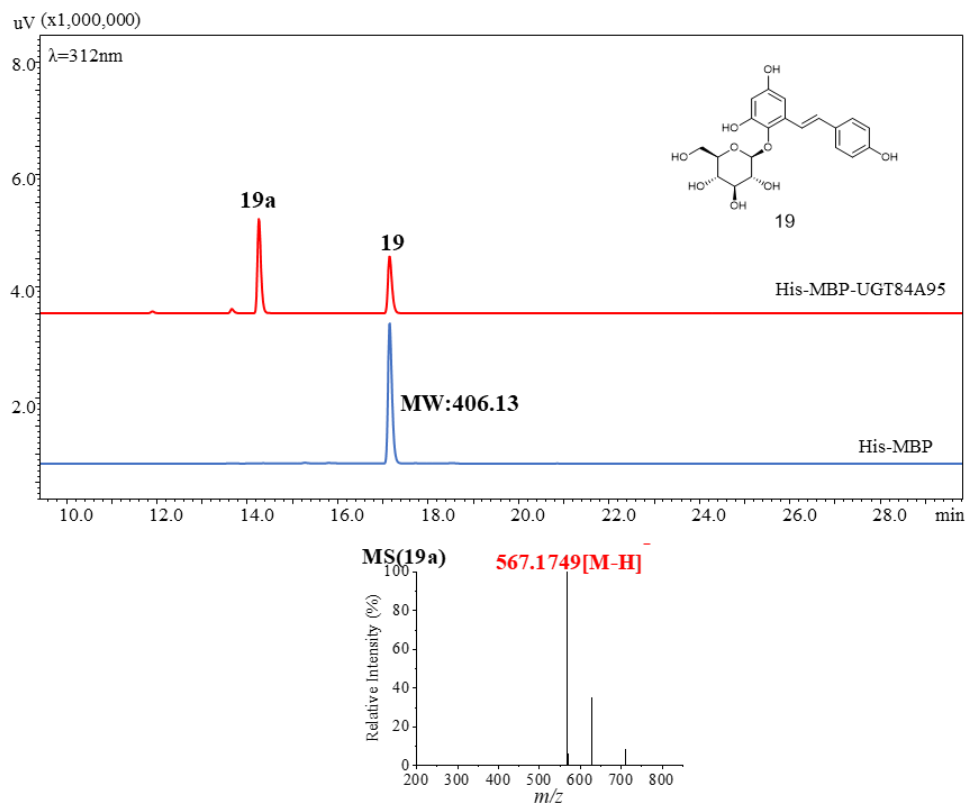

**Figure S20.** HPLC and LC-HRMS analysis of UGT84A95 catalytic reaction mixtures for compound **19**.

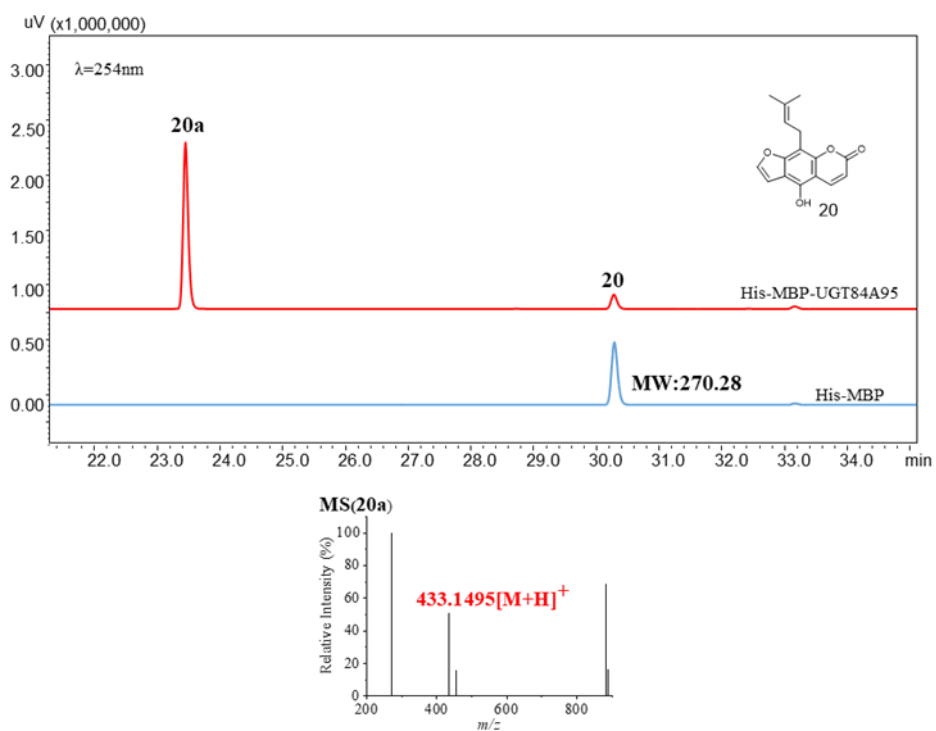

**Figure S21.** HPLC and LC-HRMS analysis of UGT84A95 catalytic reaction mixtures for compound **20**.

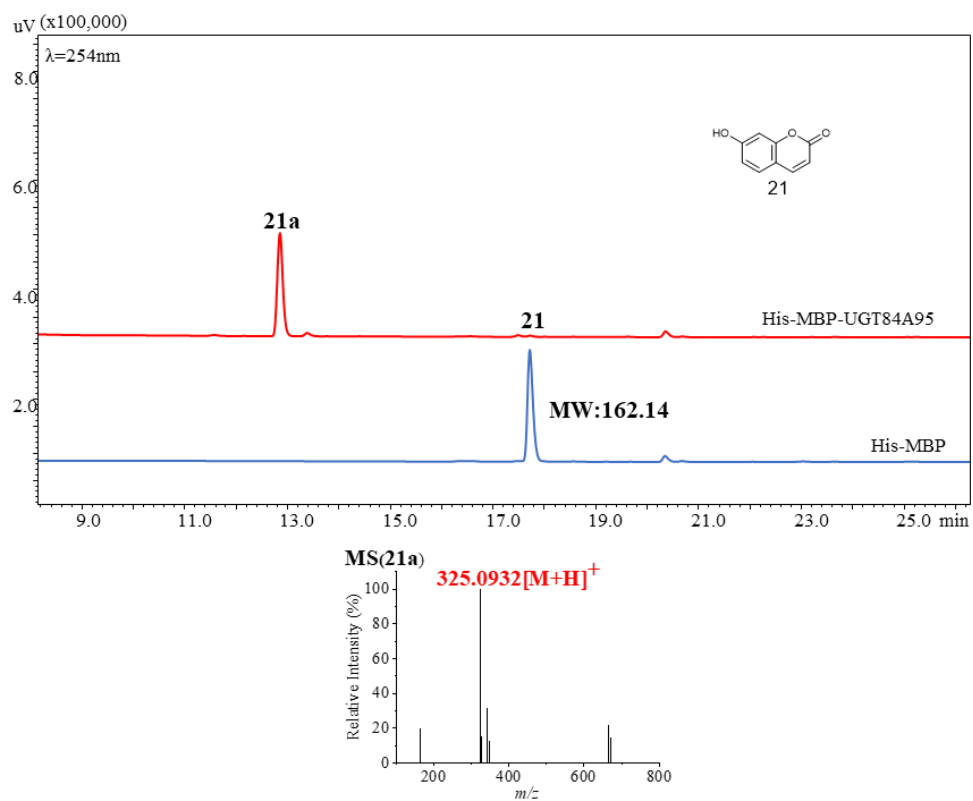

**Figure S22.** HPLC and LC-HRMS analysis of UGT84A95 catalytic reaction mixtures for compound **21**.

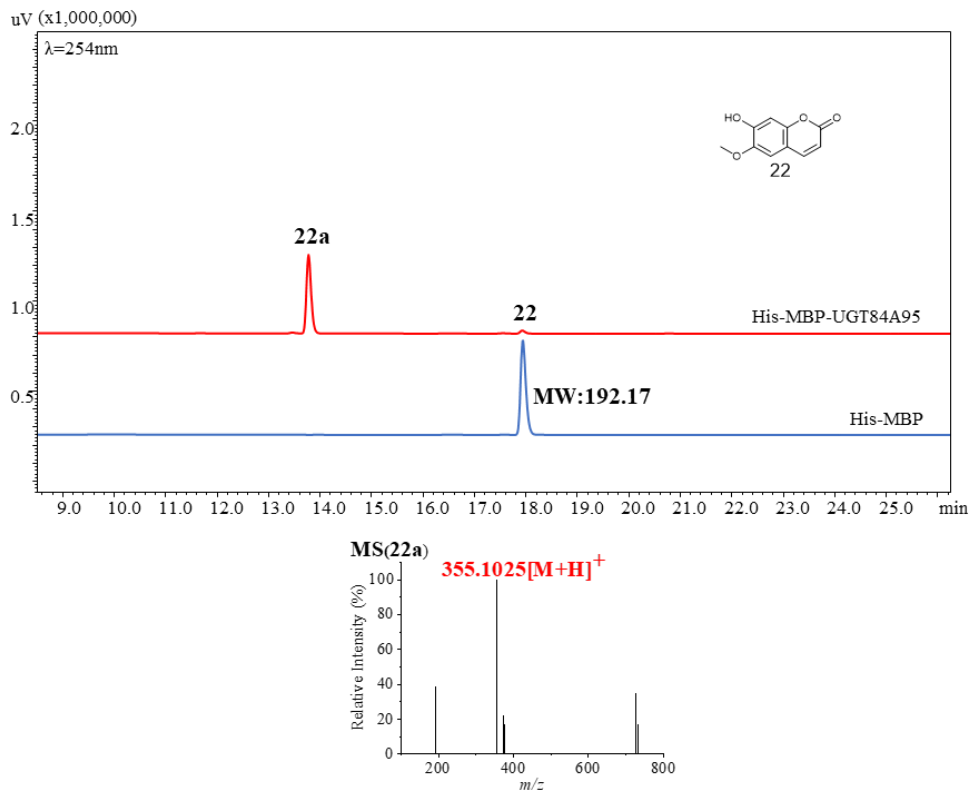

**Figure S23.** HPLC and LC-HRMS analysis of UGT84A95 catalytic reaction mixtures for compound **22**.

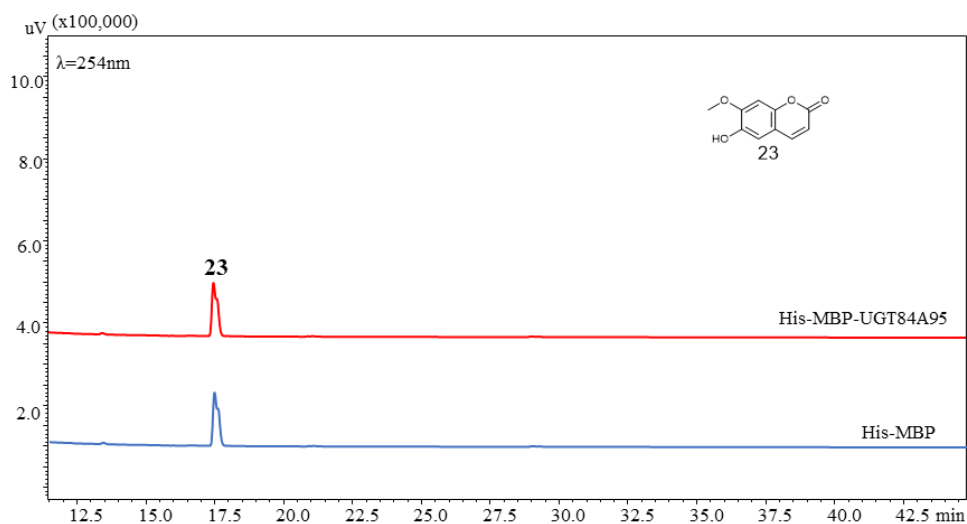

**Figure S24.** HPLC and LC-HRMS analysis of UGT84A95 catalytic reaction mixtures for compound **23**.

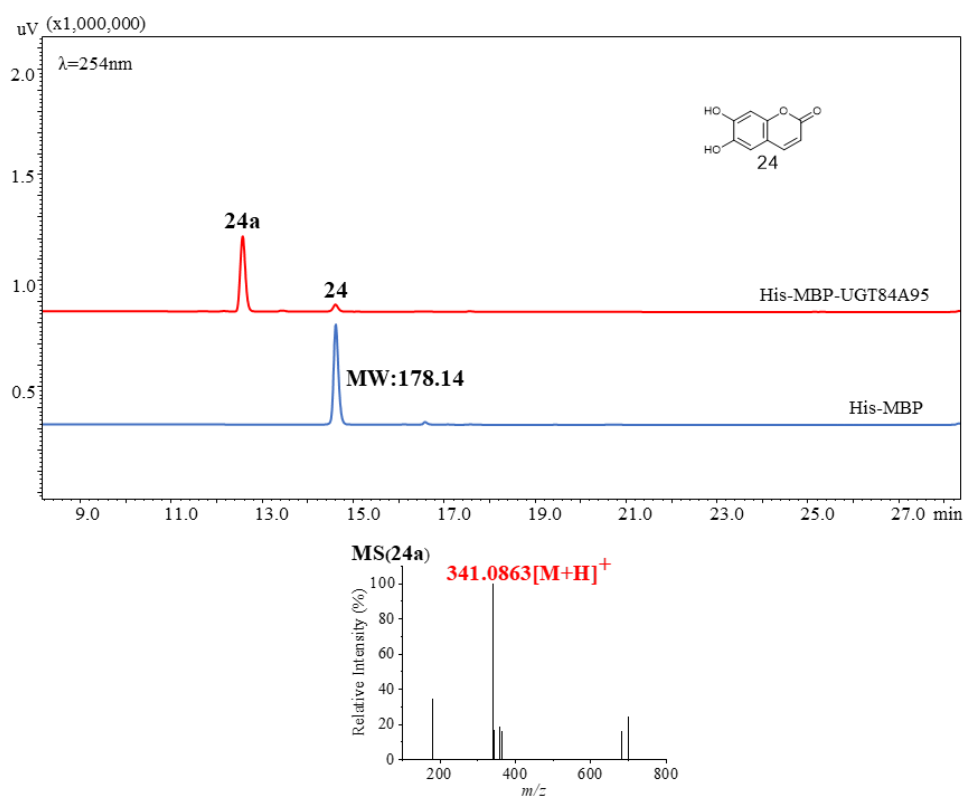

**Figure S25.** HPLC and LC-HRMS analysis of UGT84A95 catalytic reaction mixtures for compound **24**.

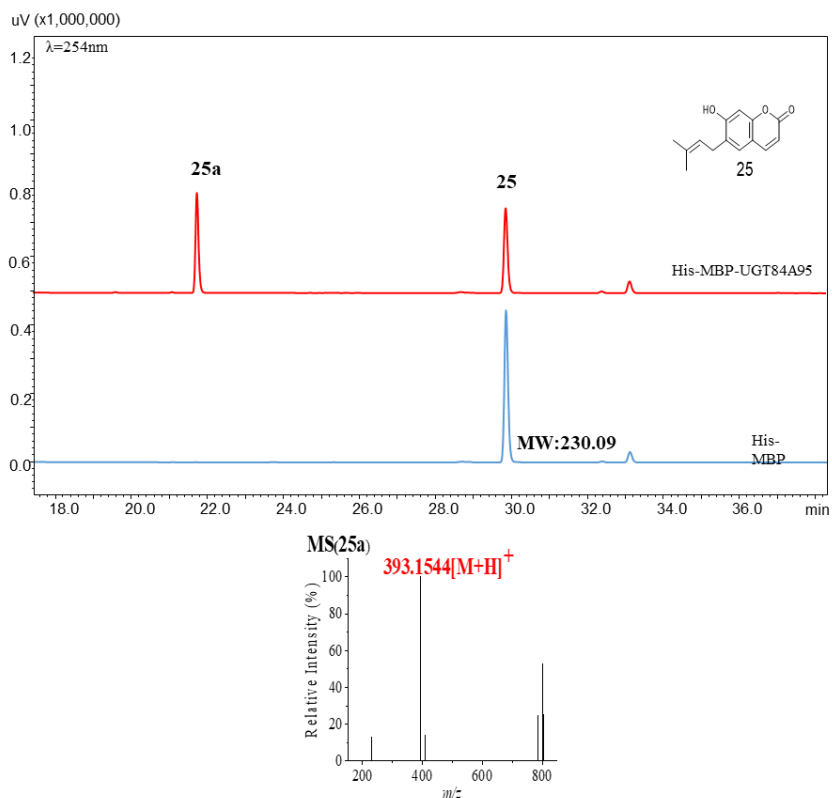

**Figure S26.** HPLC and LC-HRMS analysis of UGT84A95 catalytic reaction mixtures for compound 25.

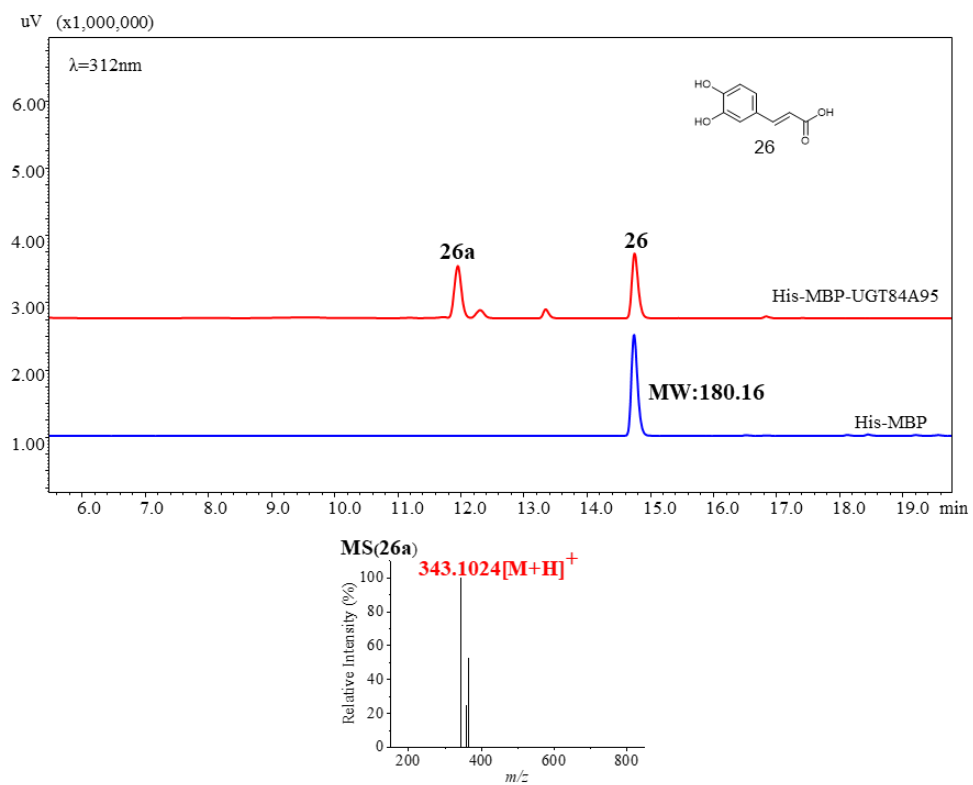

**Figure S27.** HPLC and LC-HRMS analysis of UGT84A95 catalytic reaction mixtures for compound 26.

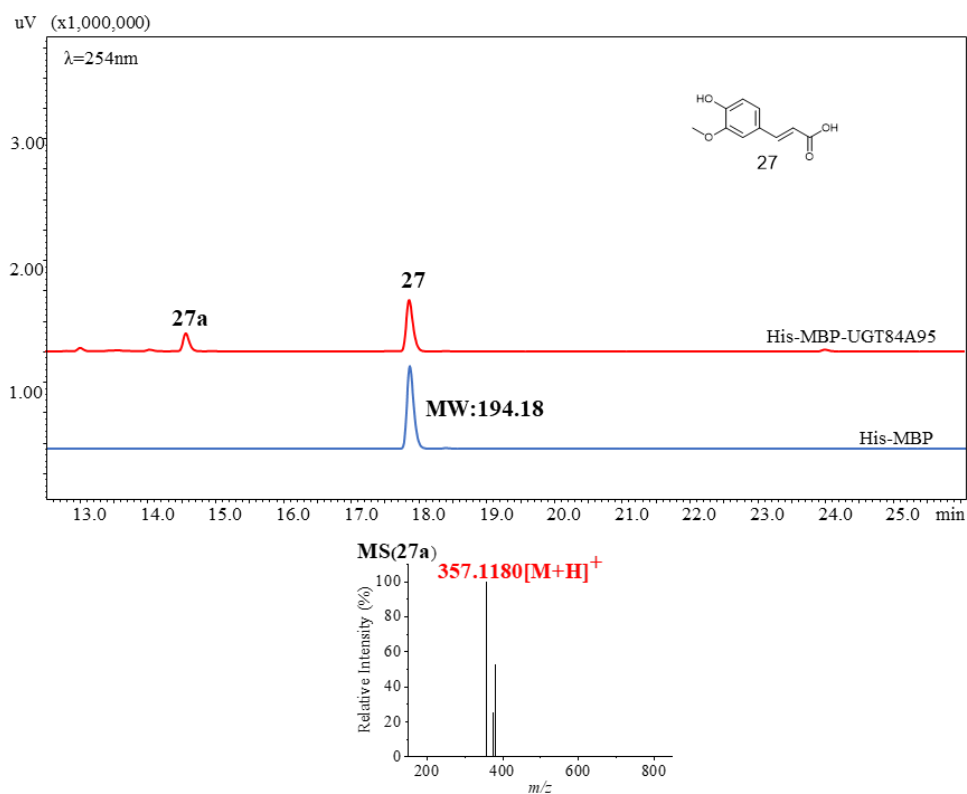

**Figure S28.** HPLC and LC-HRMS analysis of UGT84A95 catalytic reaction mixtures for compound **27**.

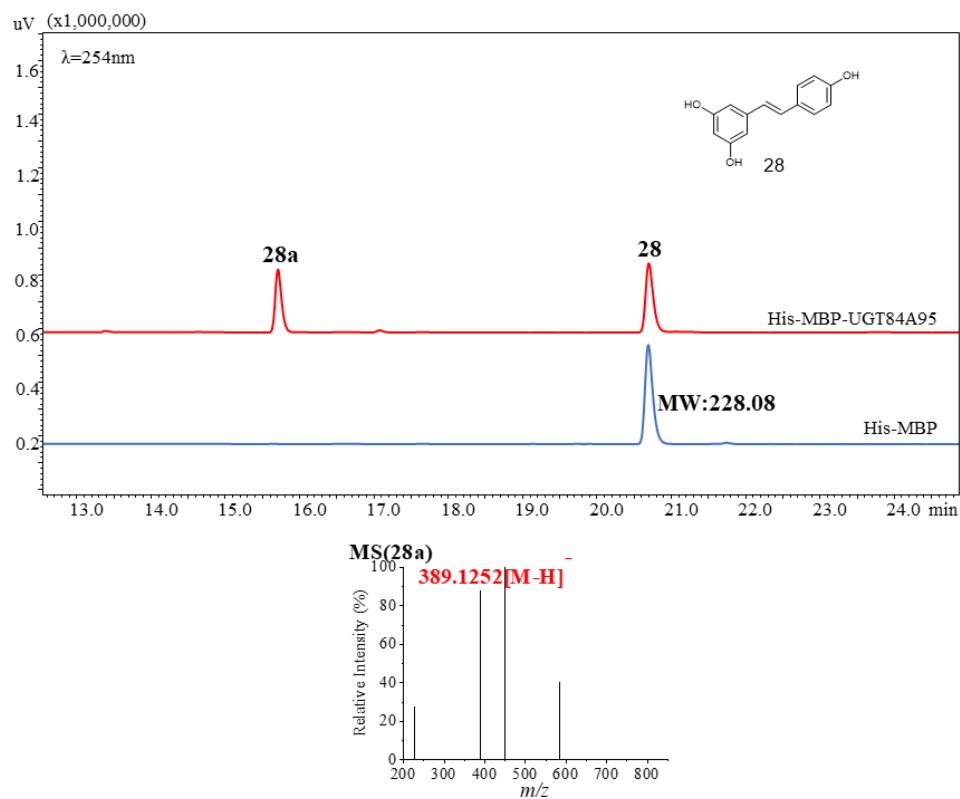

**Figure S29.** HPLC and LC-HRMS analysis of UGT84A95 catalytic reaction mixtures for compound **28**.

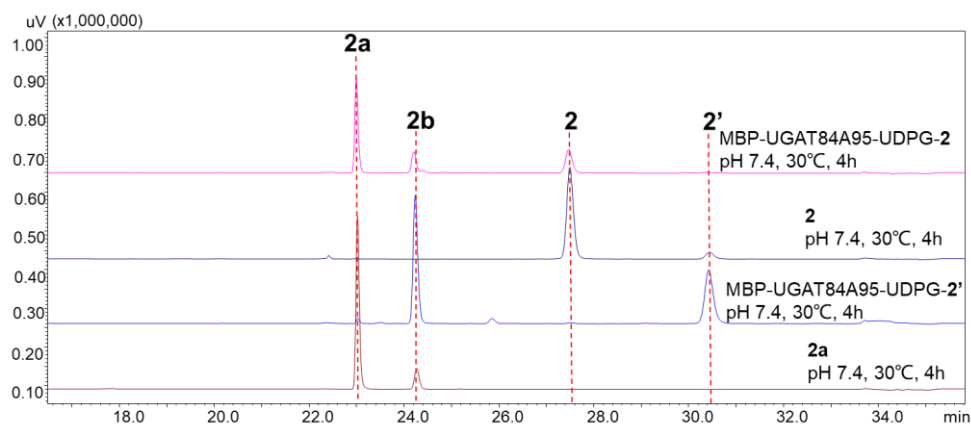

**Figure 30.** HPLC analysis of UGT84A95 catalytic reactions for compound **2** and **2'**.

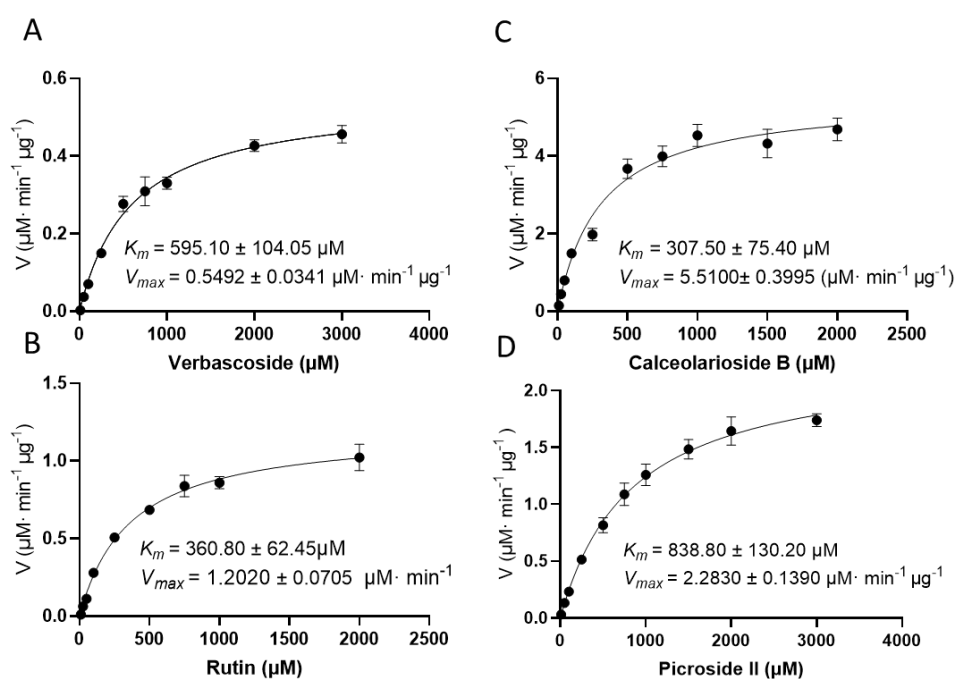

**Figure S31.** Determination of kinetic parameters ( $K_m$  and  $V_{max}$  values) for purified UGT71BD1 using UDP-Glc as a sugar donor and **2**, **5**, **8** and **14** as sugar acceptors, respectively.

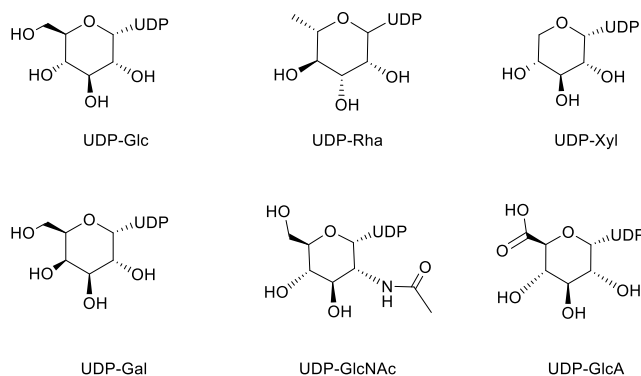

**Figure S32.** Structures of sugar donor in this study.

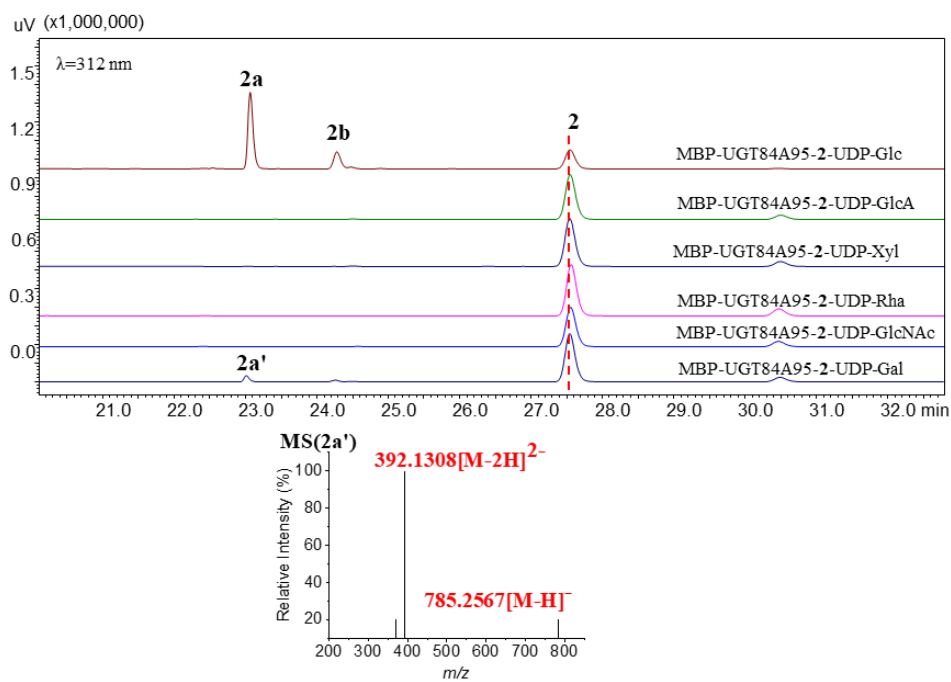

**Figure S33.** HPLC and LC-HRMS analysis of UGT84A95 catalytic reaction mixtures using different sugar donors and using **2** as the acceptor.

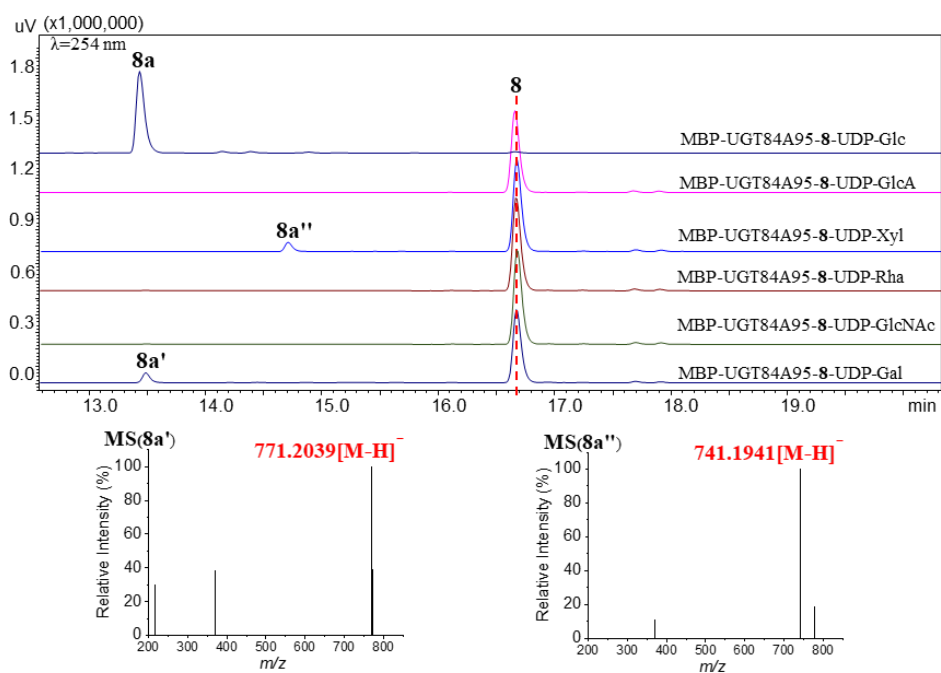

**Figure S34.** HPLC and LC-HRMS analysis of UGT84A95 catalytic reaction mixtures using different sugar donors and using **8** as the acceptor.



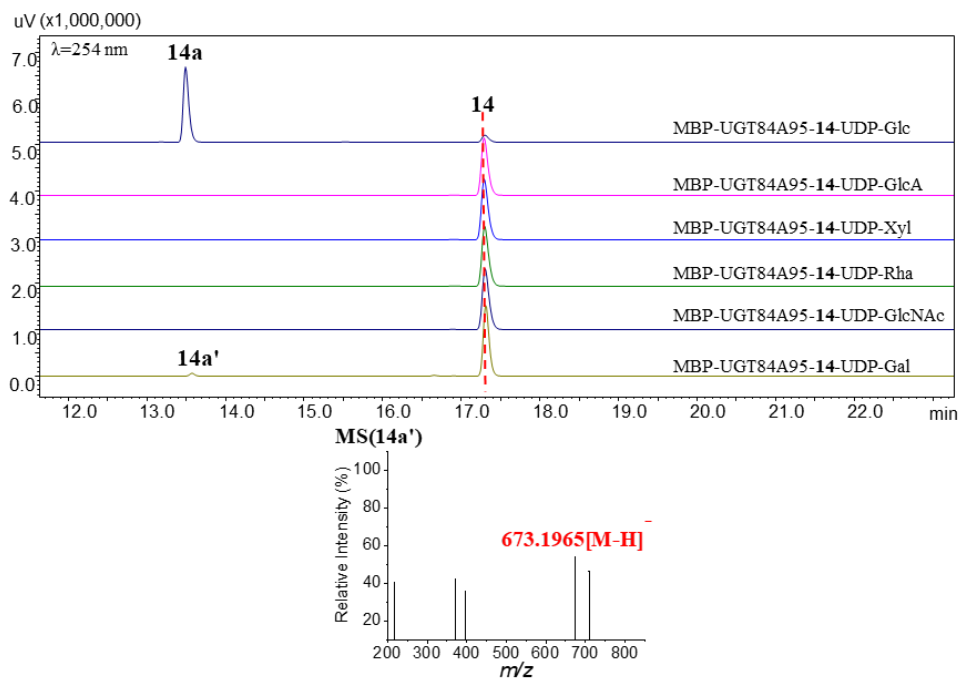

**Figure S35.** HPLC and LC-HRMS analysis of UGT84A95 catalytic reaction mixtures using different sugar donors and using **14** as the acceptor

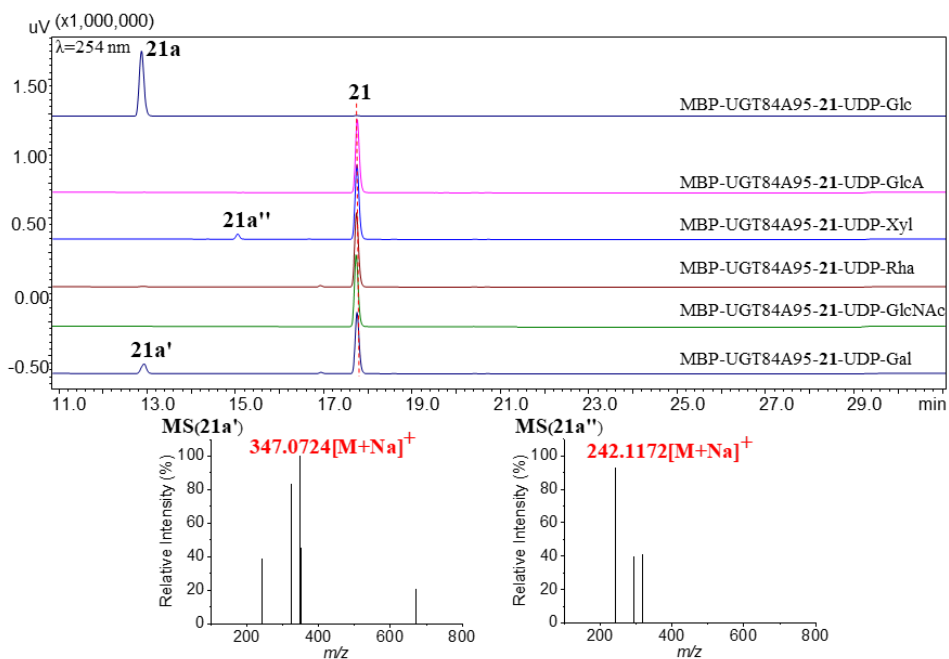

**Figure S36.** HPLC and LC-HRMS analysis of UGT84A95 catalytic reaction mixtures using different sugar donors and using **21** as the acceptor.

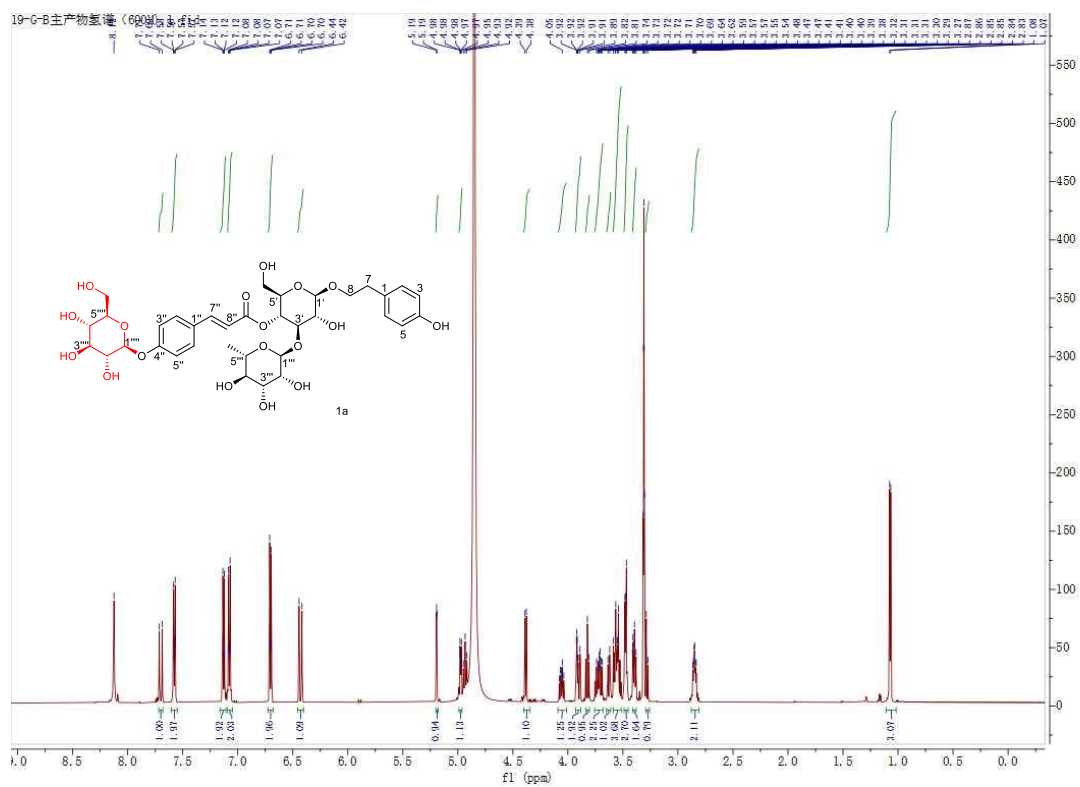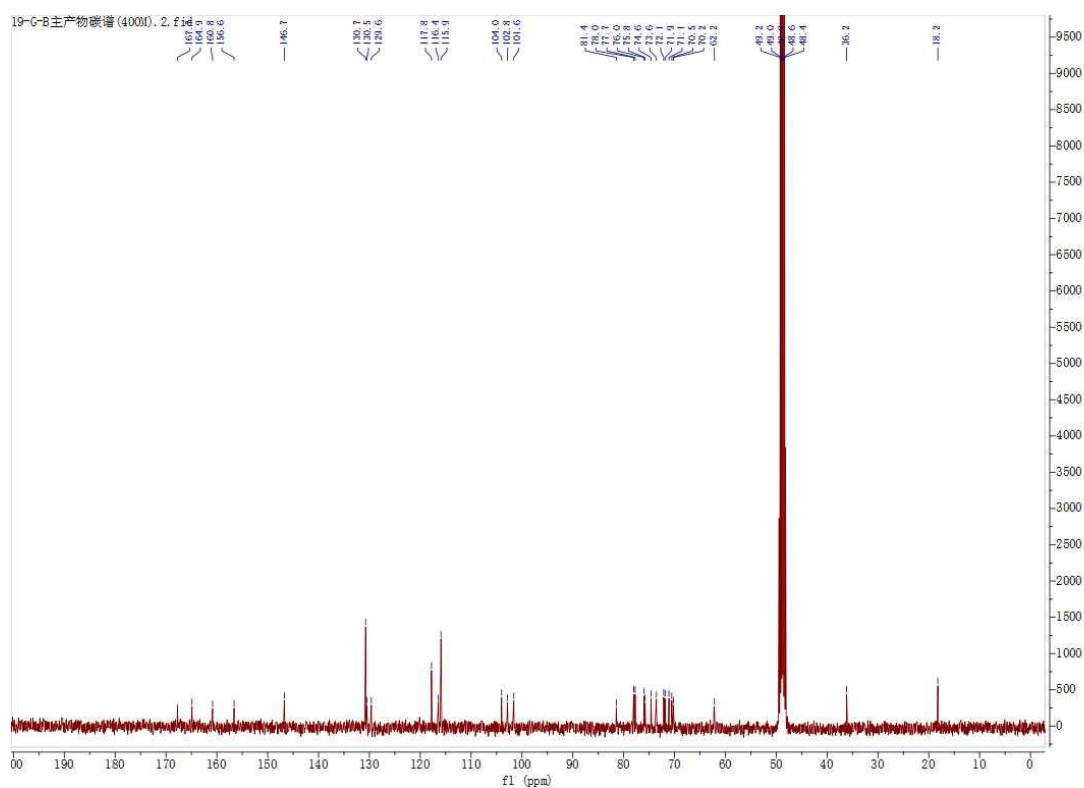

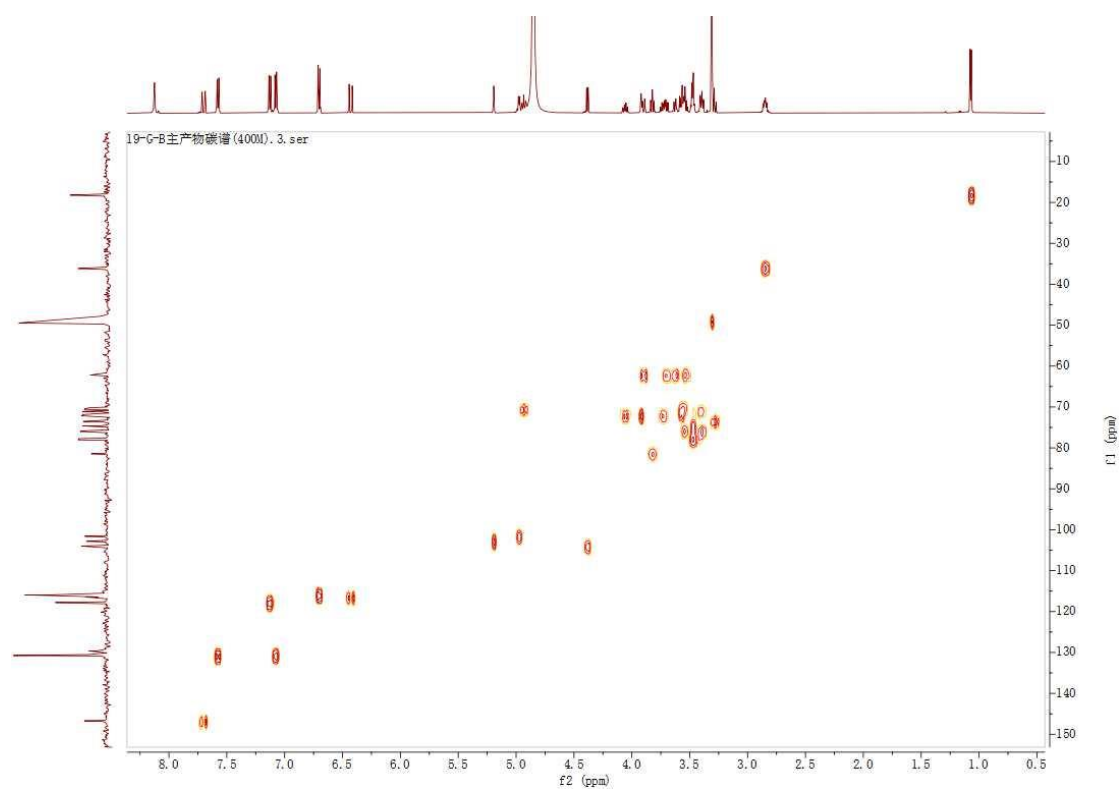

Figure S39. HSQC spectrum of glycosylated product **1a** (CD<sub>3</sub>OD, 400 MHz).

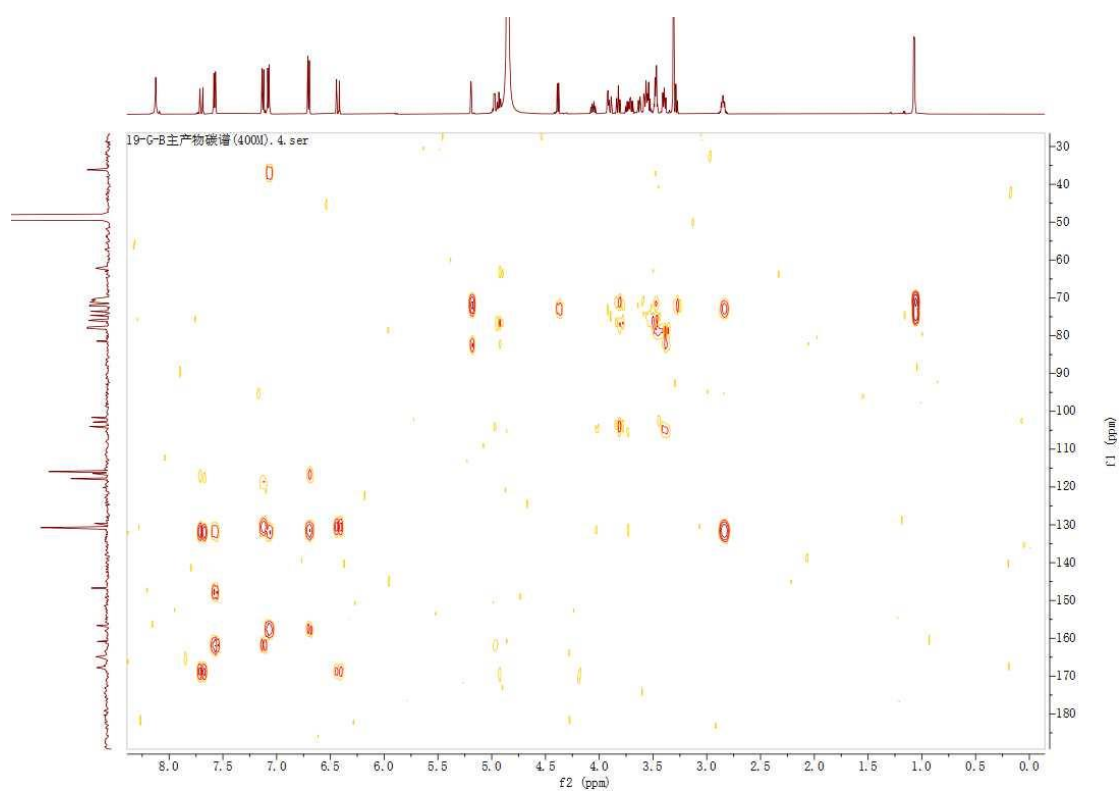

Figure S40. HMBC spectrum of glycosylated product **1a** (CD<sub>3</sub>OD, 400 MHz).

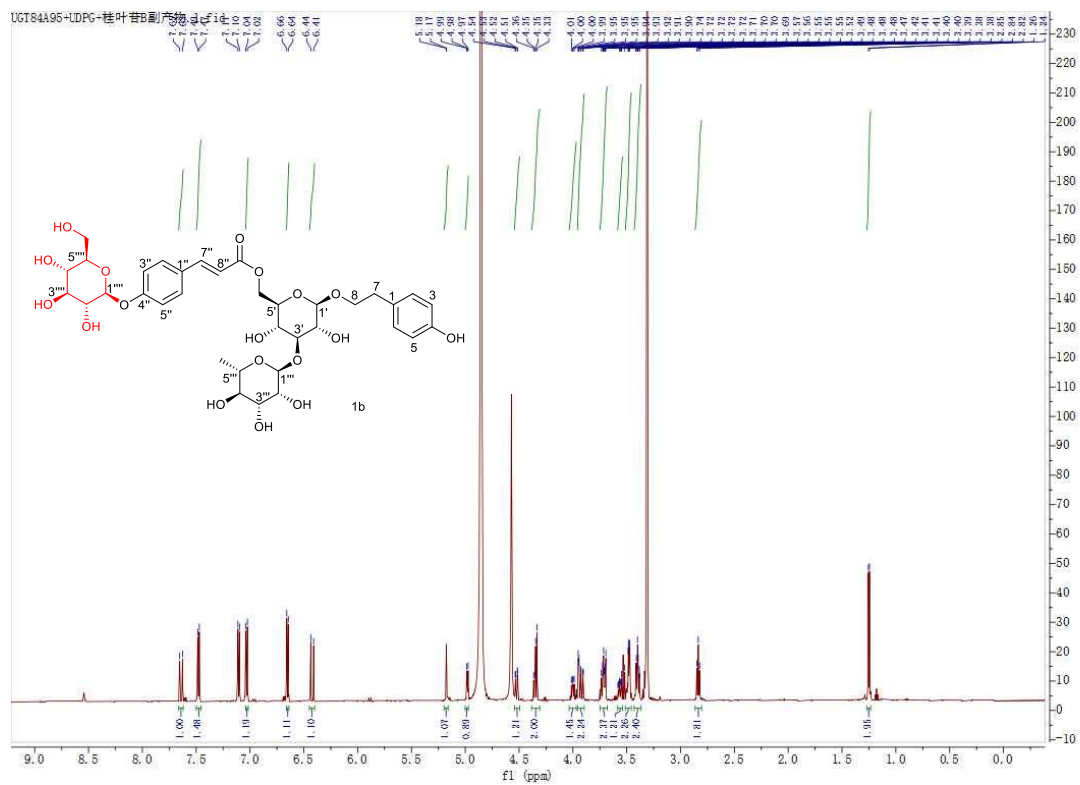

Figure S41.  $^1\text{H}$  NMR spectrum of glycosylated product **1b** ( $\text{CD}_3\text{OD}$ , 600 MHz).

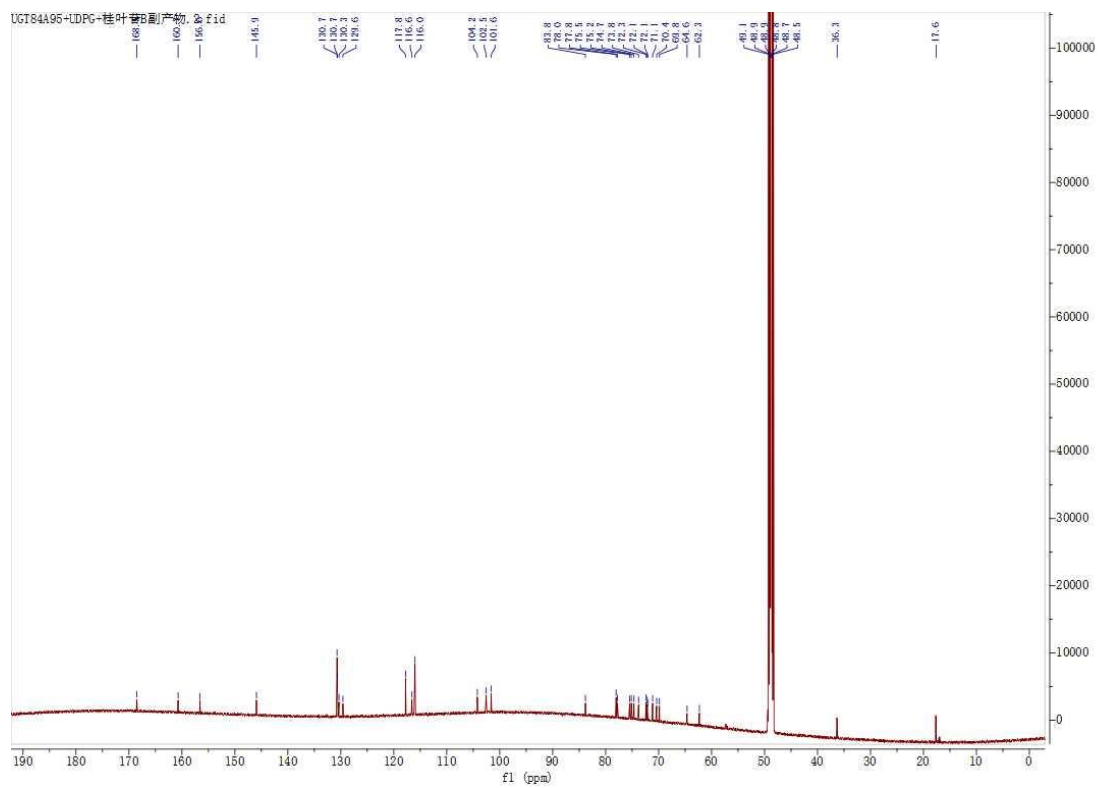

Figure S42.  $^{13}\text{C}$  NMR spectrum of glycosylated product **1b** ( $\text{CD}_3\text{OD}$ , 600 MHz).

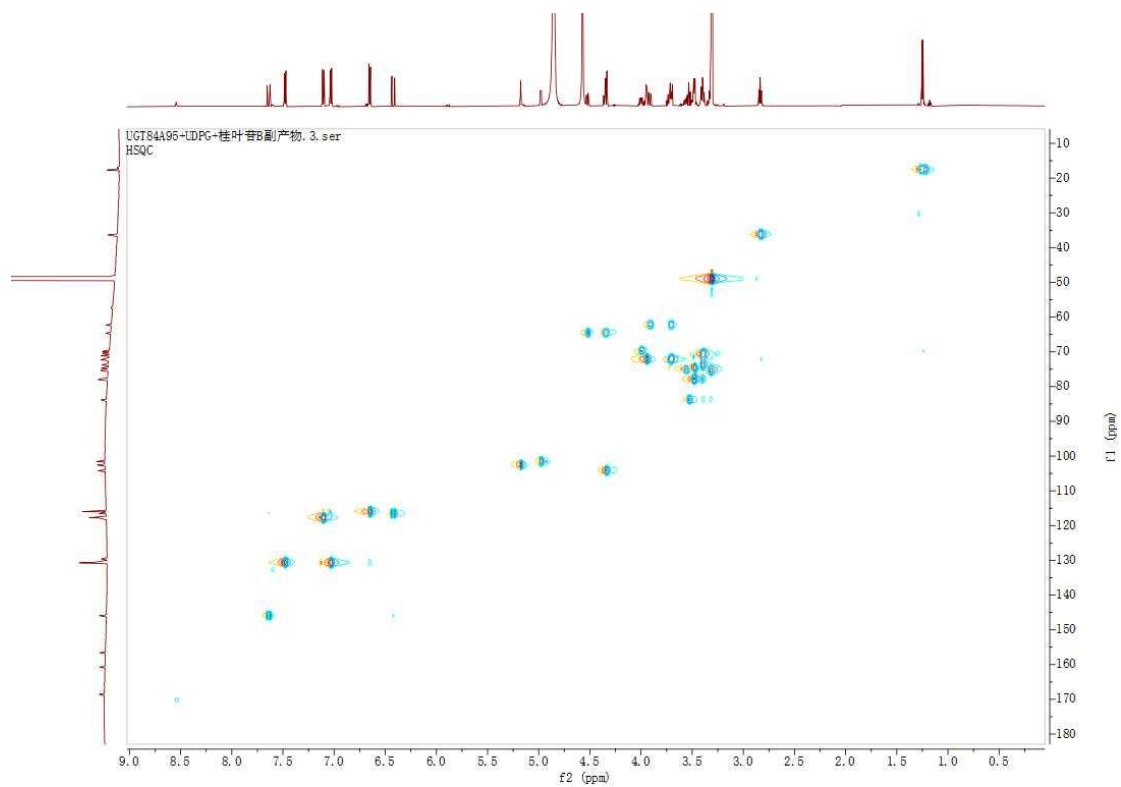

**Figure S43.** HSQC spectrum of glycosylated product **1b** (CD<sub>3</sub>OD, 600 MHz).

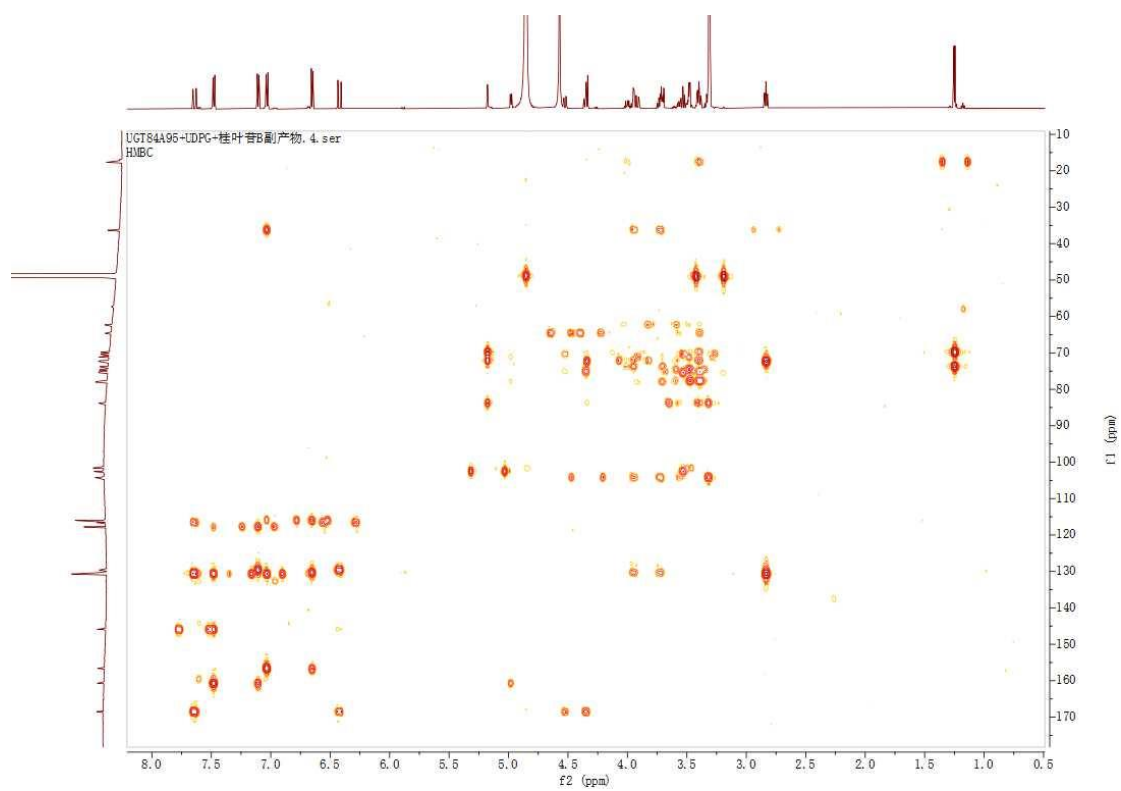

**Figure S44.** HMBC spectrum of glycosylated product **1b** (CD<sub>3</sub>OD, 600 MHz).

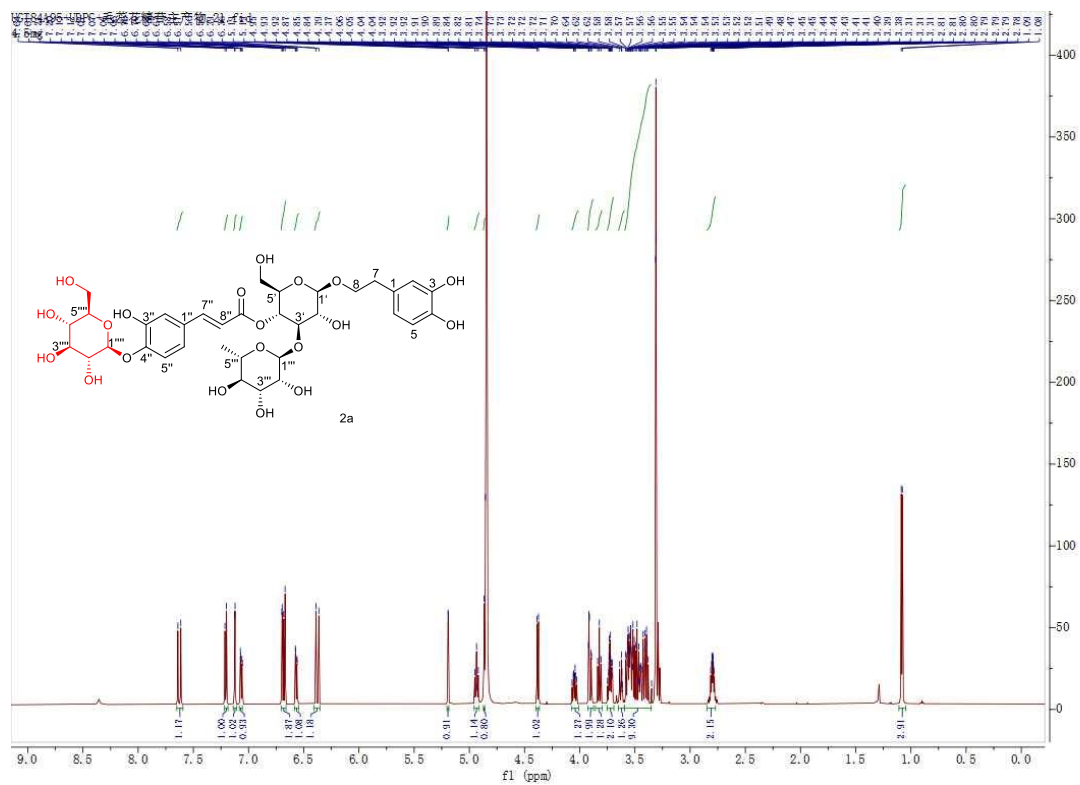

Figure S45.  $^1\text{H}$  NMR spectrum of glycosylated product **2a** ( $\text{CD}_3\text{OD}$ , 600 MHz).

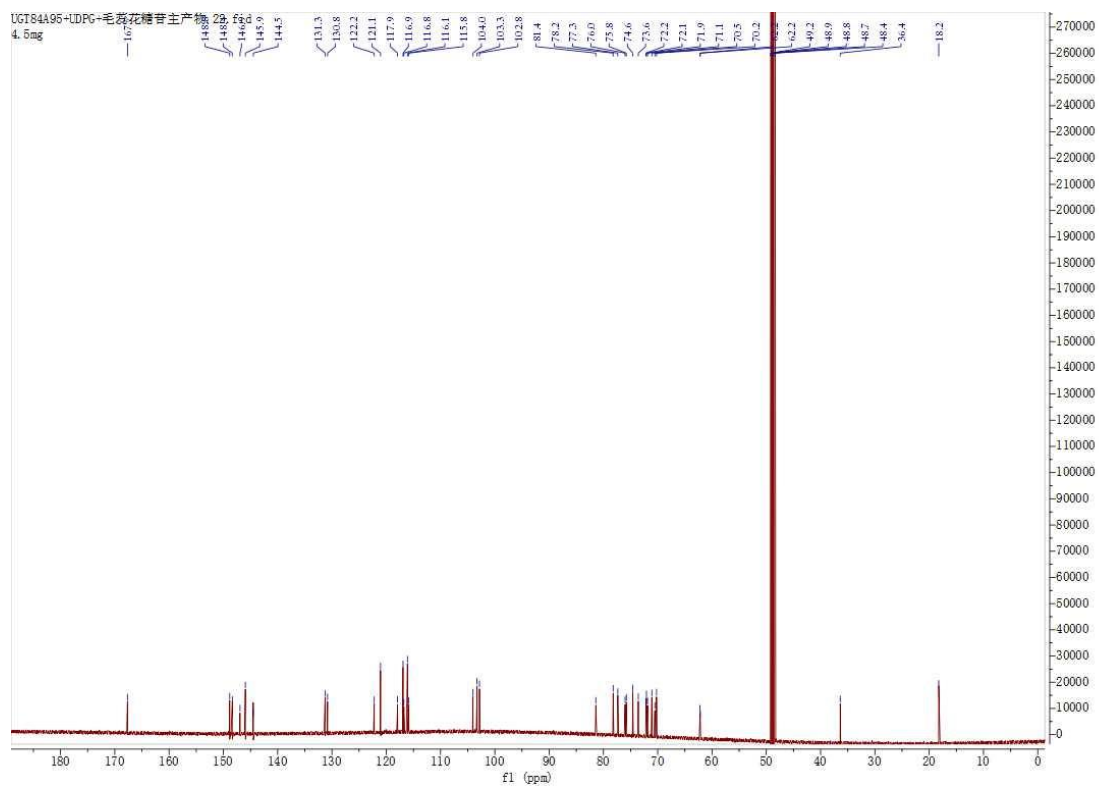

Figure S46.  $^{13}\text{C}$  NMR spectrum of glycosylated product **2a** ( $\text{CD}_3\text{OD}$ , 600 MHz).

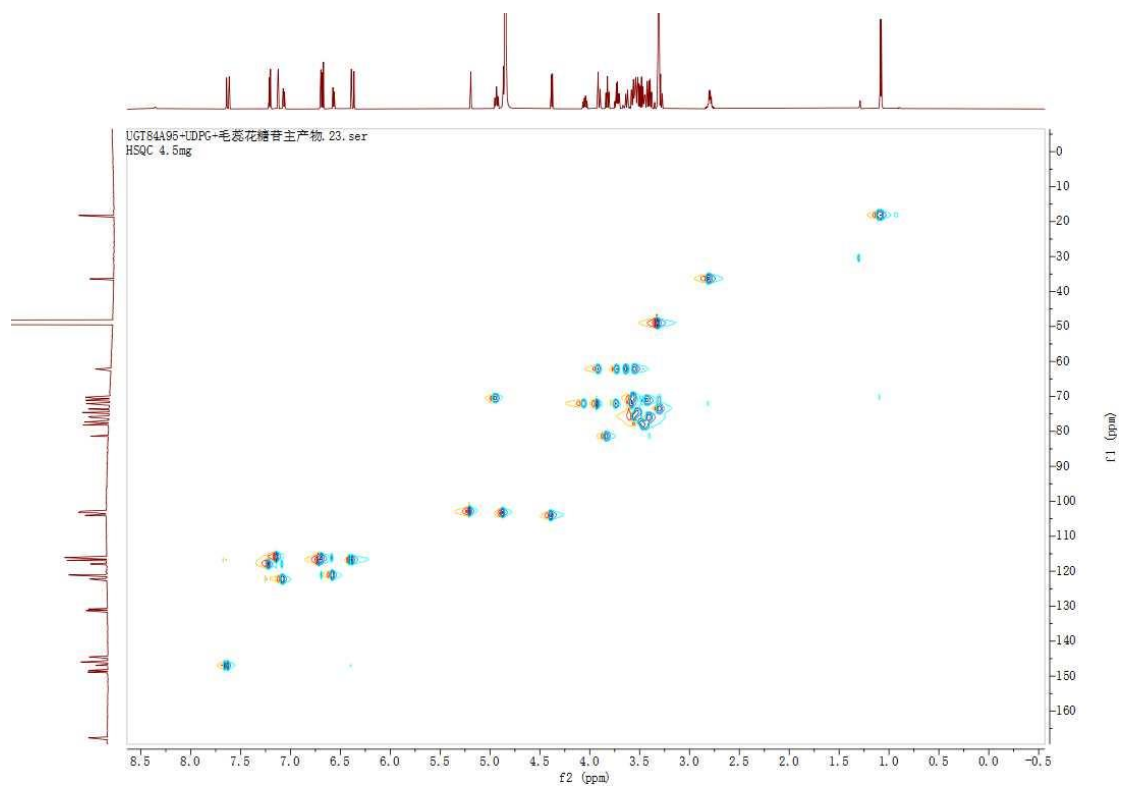

**Figure S47.** HSQC NMR spectrum of glycosylated product **2a** (CD<sub>3</sub>OD, 600 MHz).

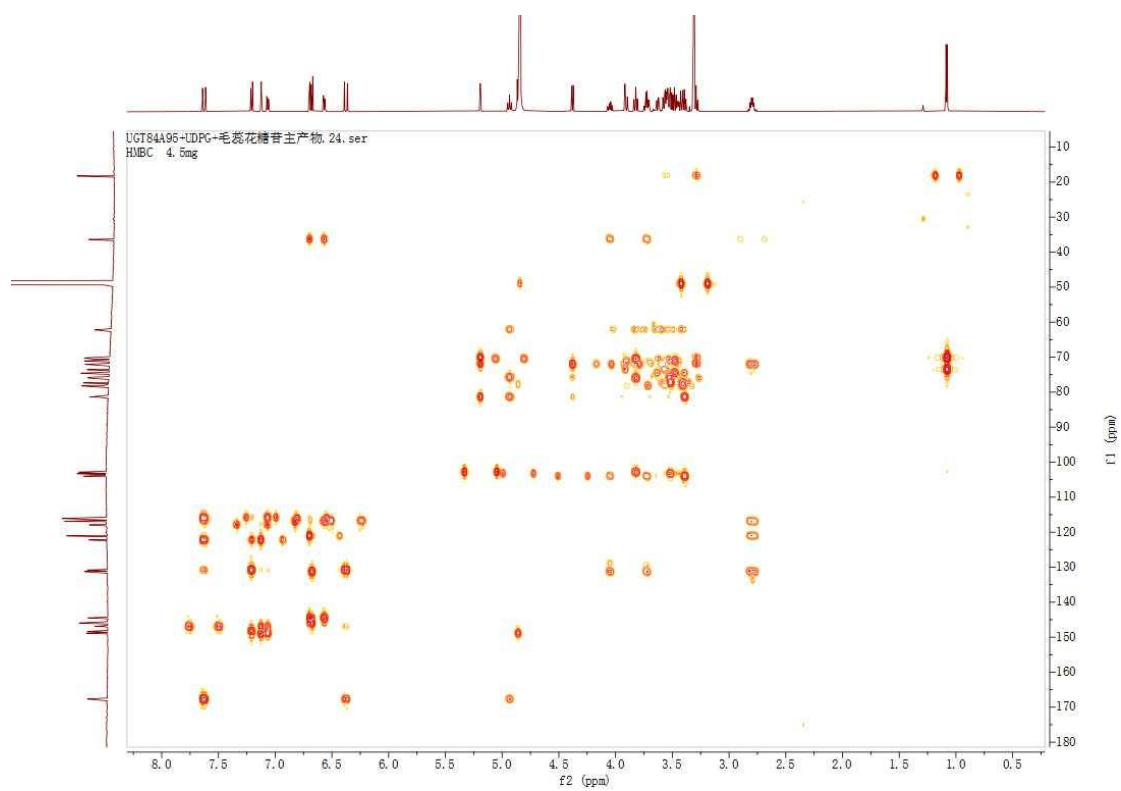

**Figure S48.** HMBC NMR spectrum of glycosylated product **2a** (CD<sub>3</sub>OD, 600 MHz).

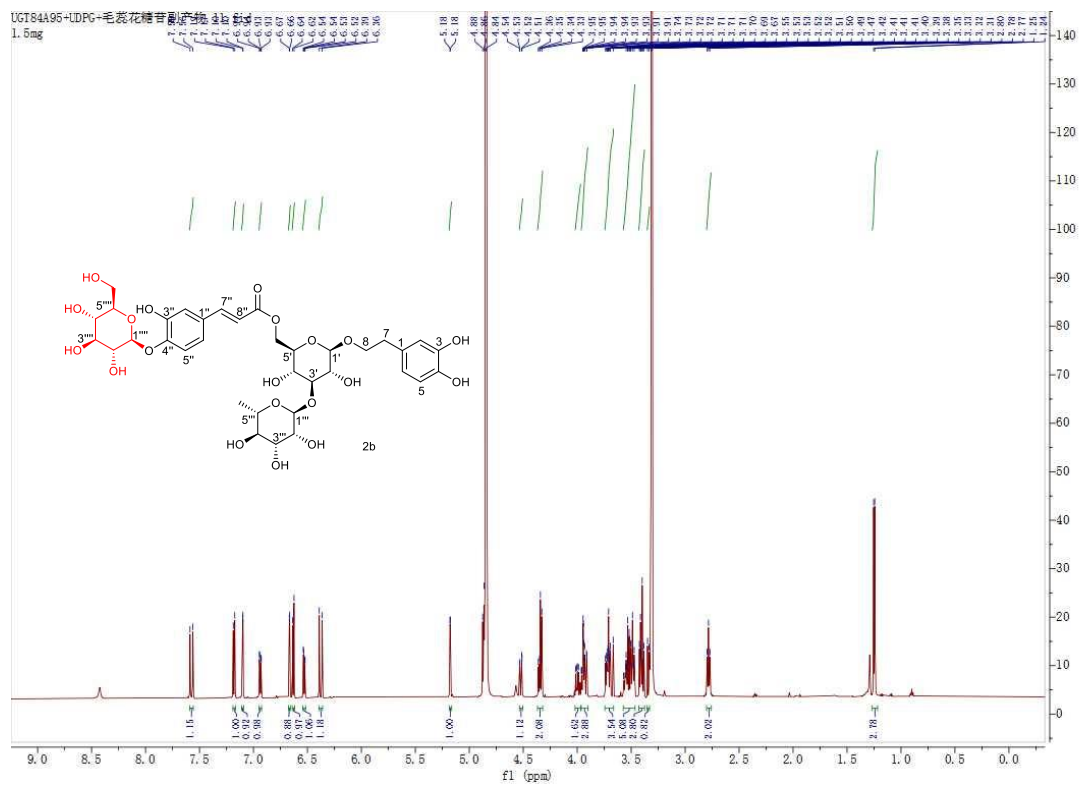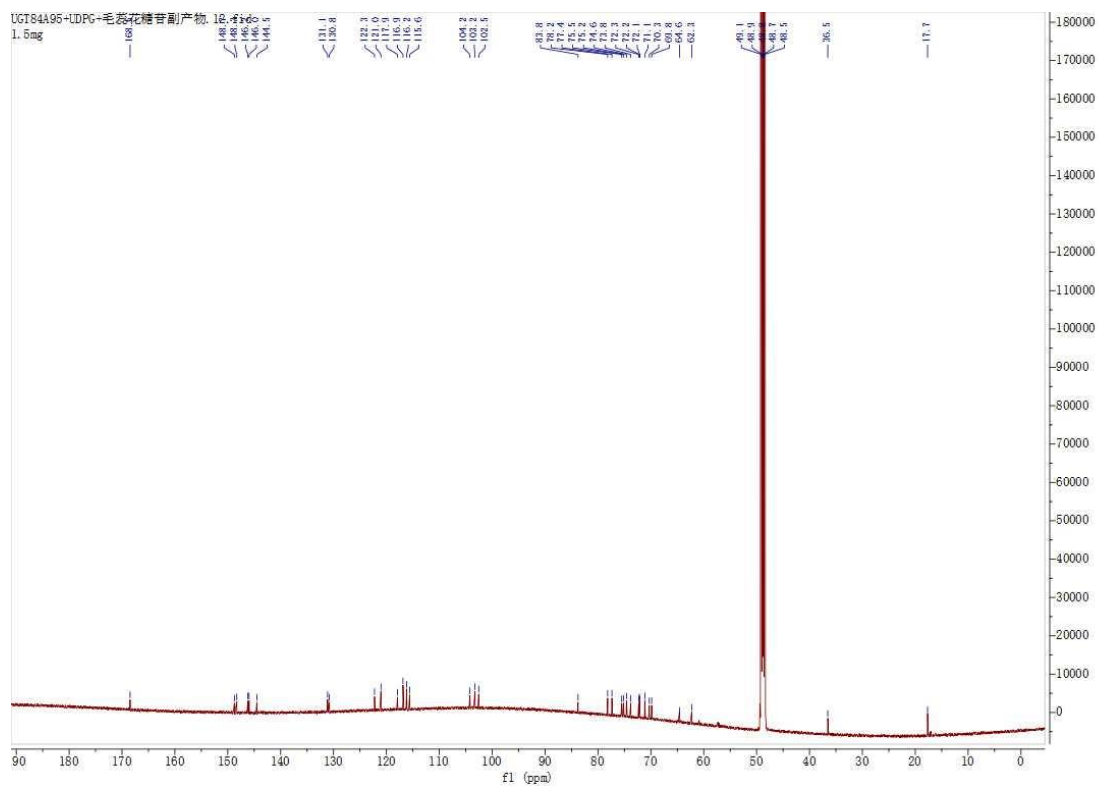



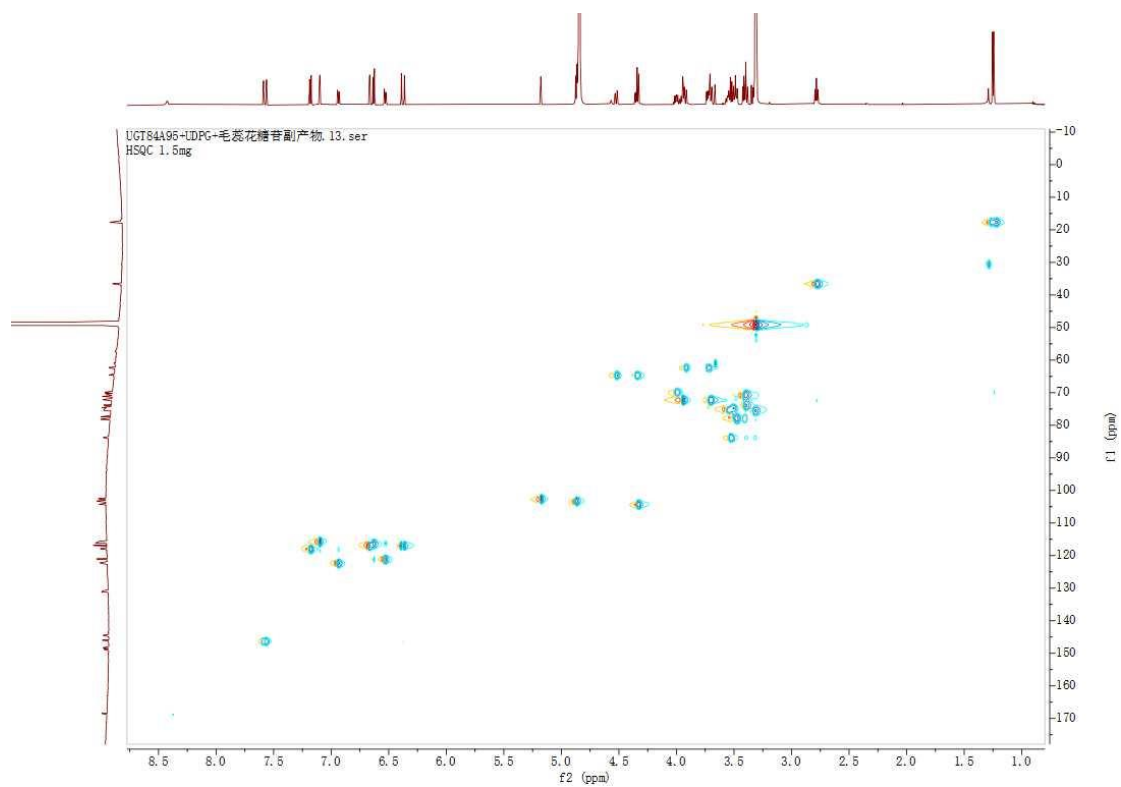

Figure S51. HSQC spectrum of glycosylated product **2b** (CD<sub>3</sub>OD, 600 MHz).

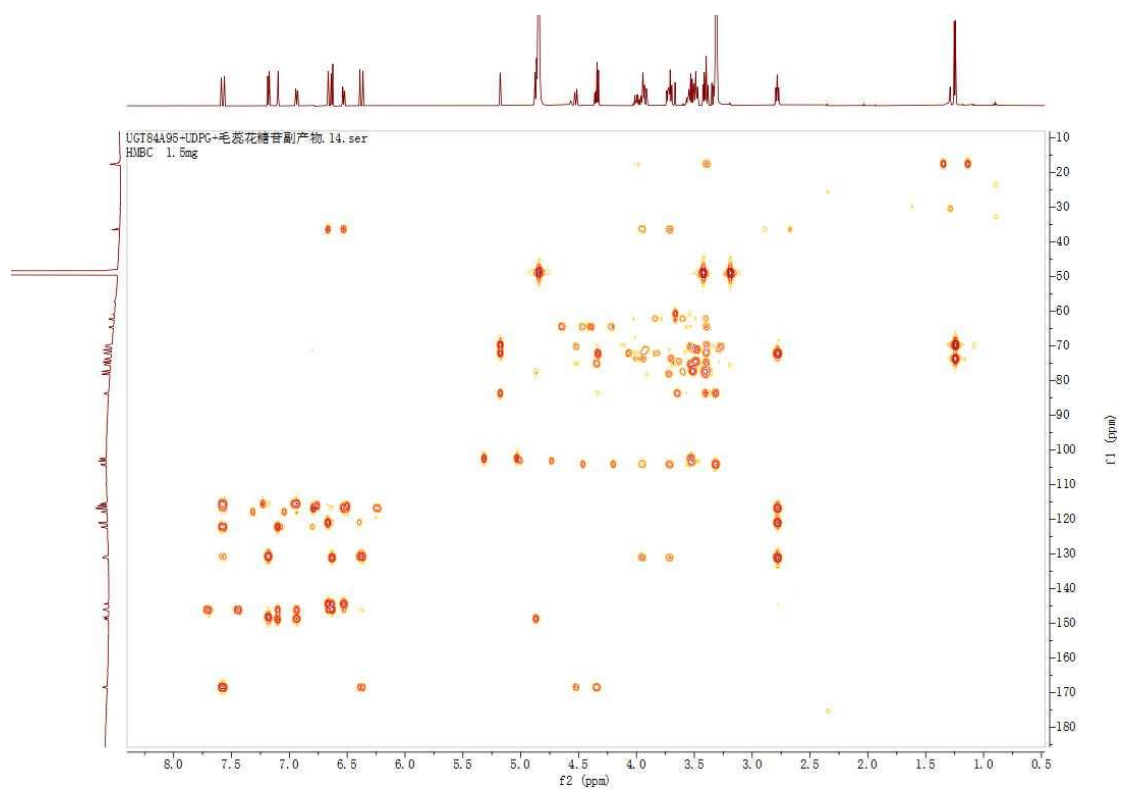

Figure S52. HMBC spectrum of glycosylated product **2b** (CD<sub>3</sub>OD, 600 MHz).

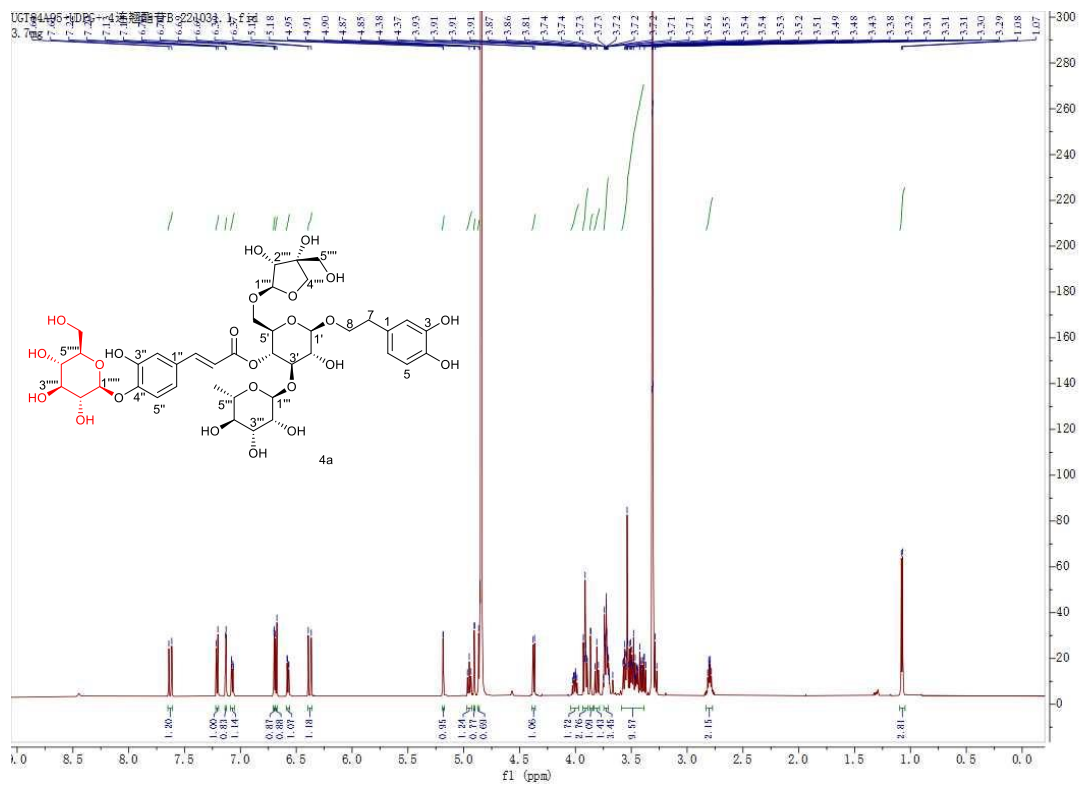

Figure S53. <sup>1</sup>H NMR spectrum of glycosylated product 4a (CD<sub>3</sub>OD, 600 MHz).

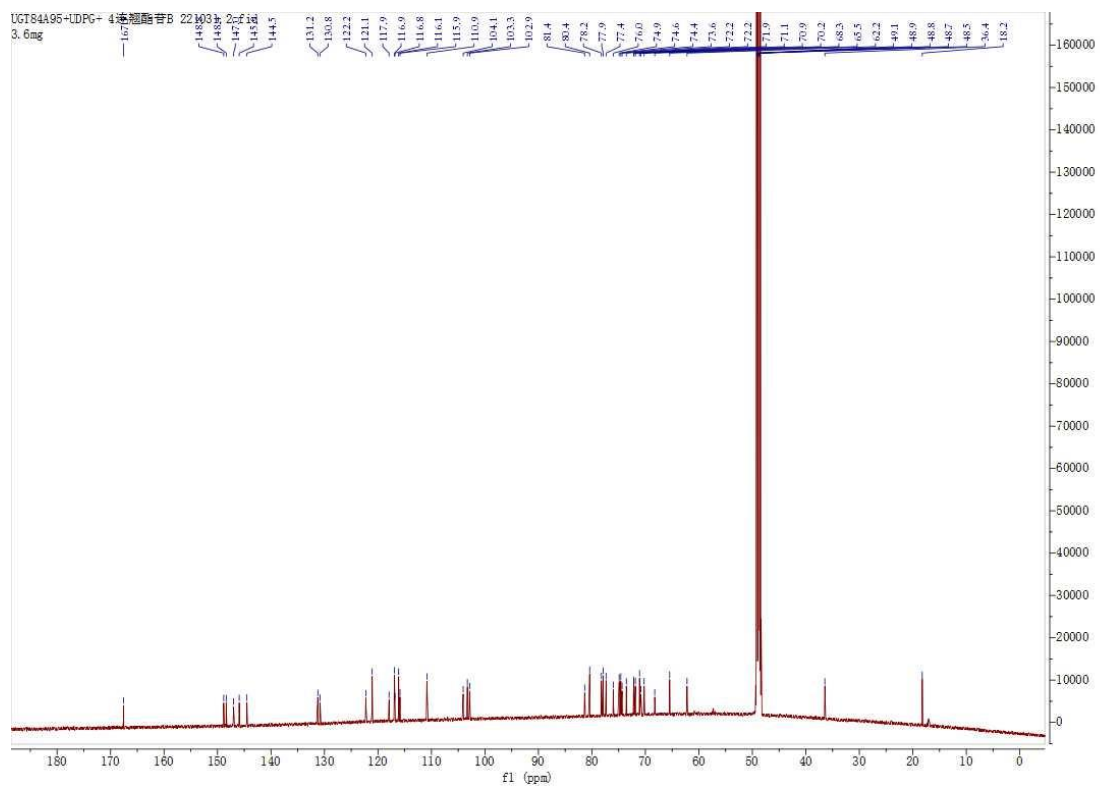

Figure S54. <sup>13</sup>C NMR spectrum of glycosylated product 4a (CD<sub>3</sub>OD, 600 MHz).

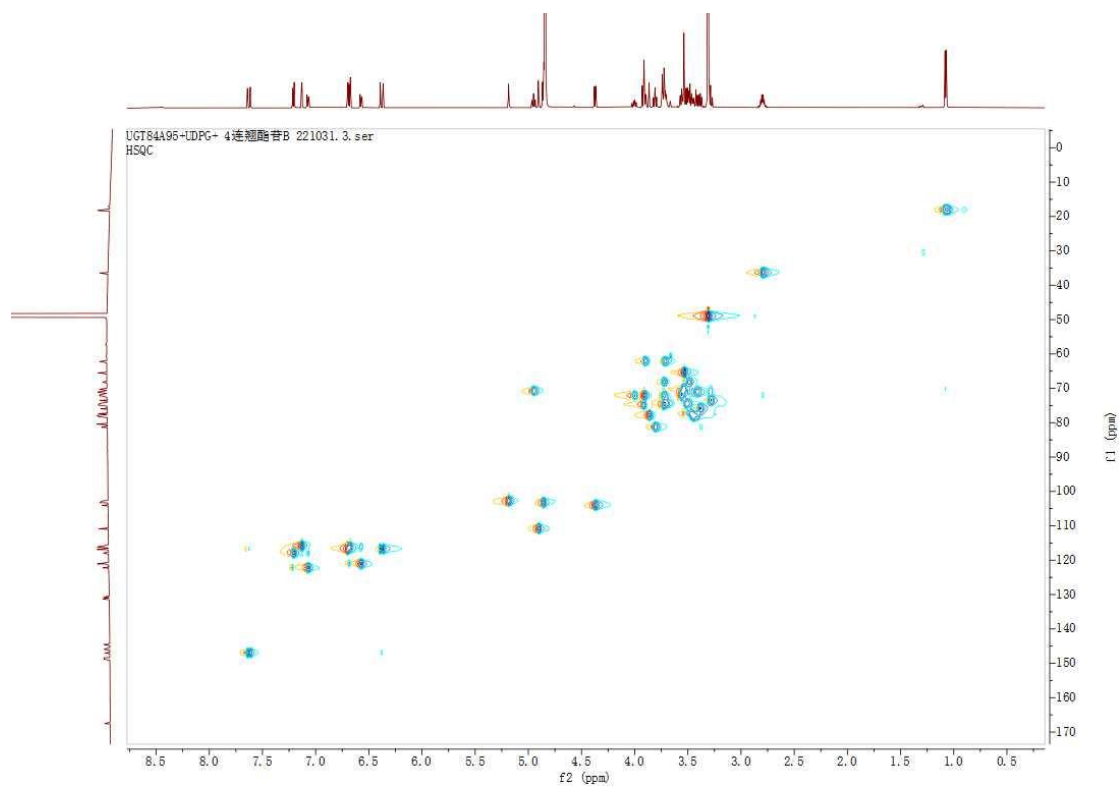

Figure S55. HSQC spectrum of glycosylated product **4a** (CD<sub>3</sub>OD, 600 MHz).

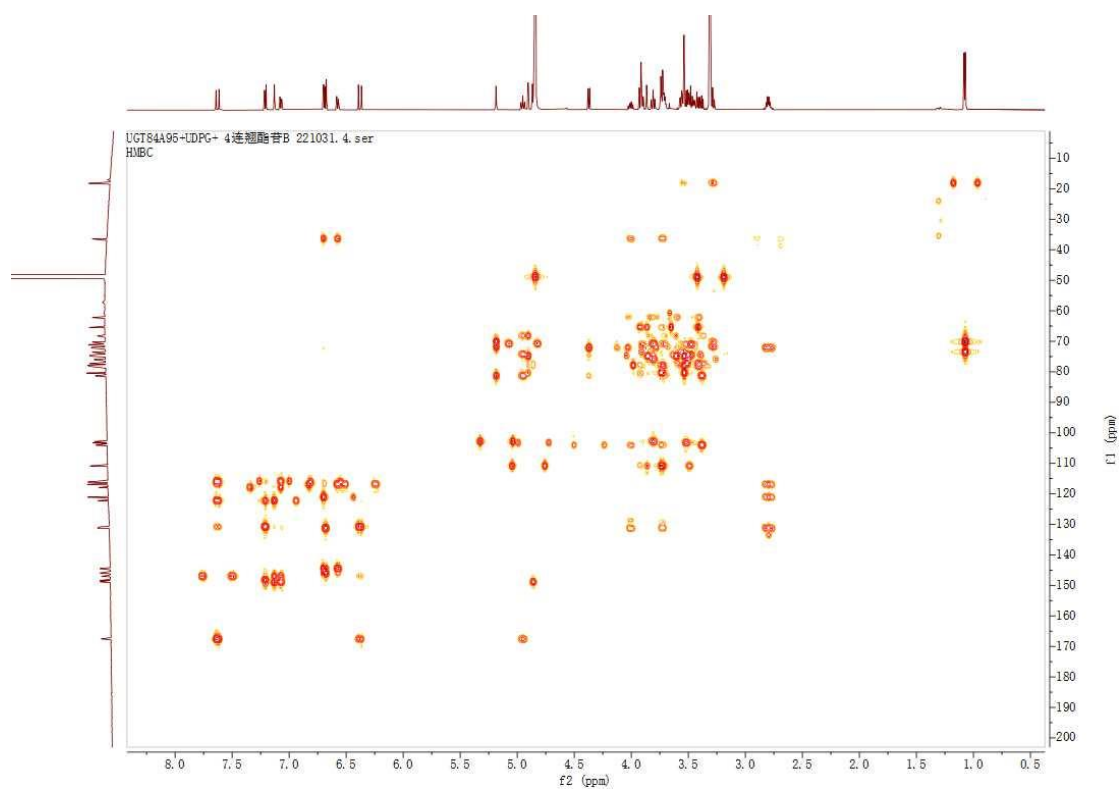

Figure S56. HMBC spectrum of glycosylated product **4a** (CD<sub>3</sub>OD, 600 MHz).

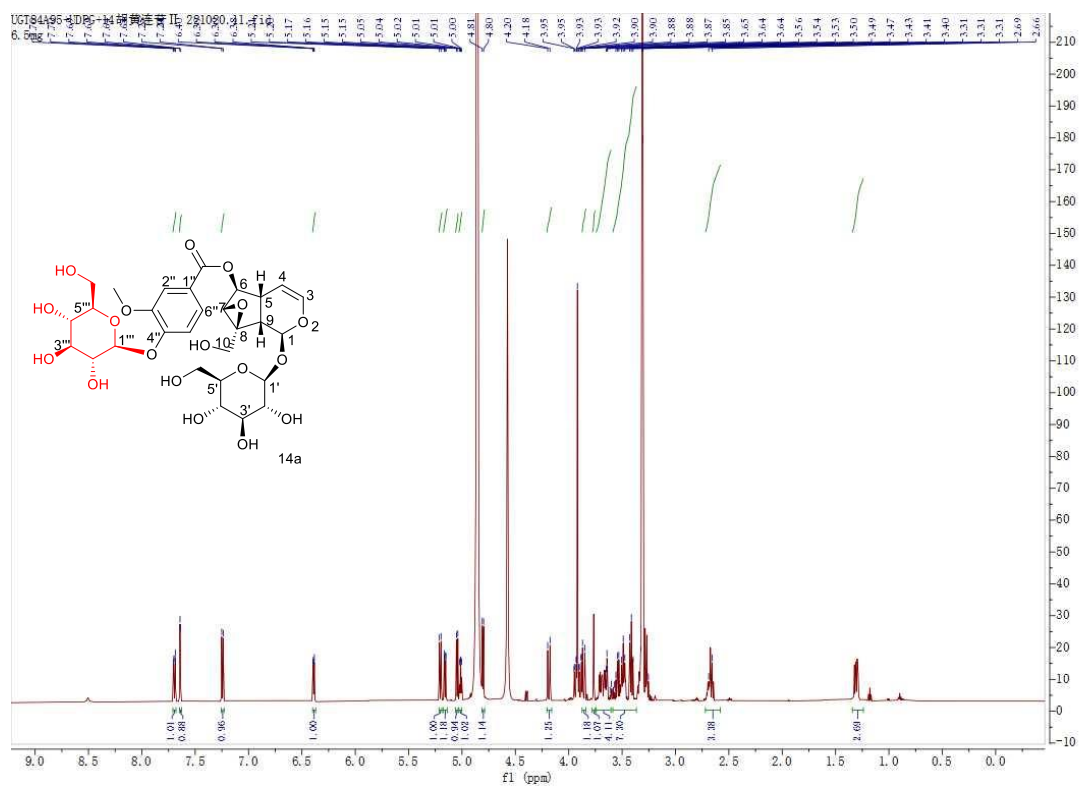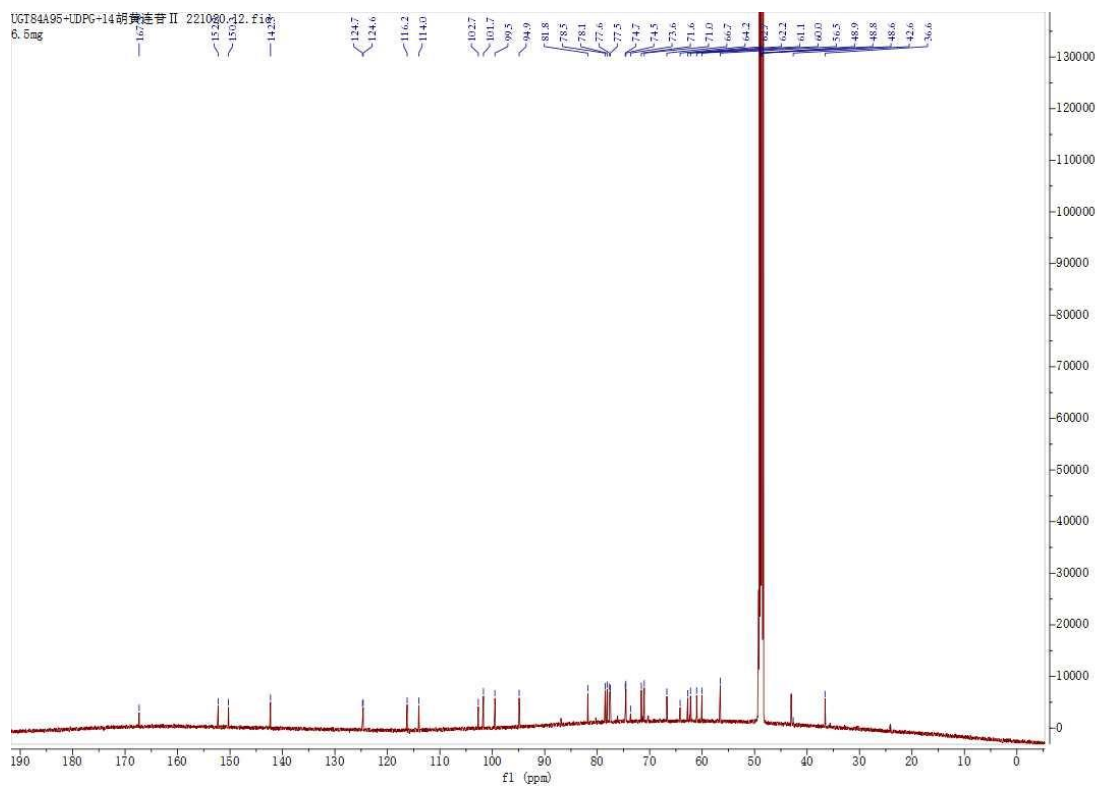

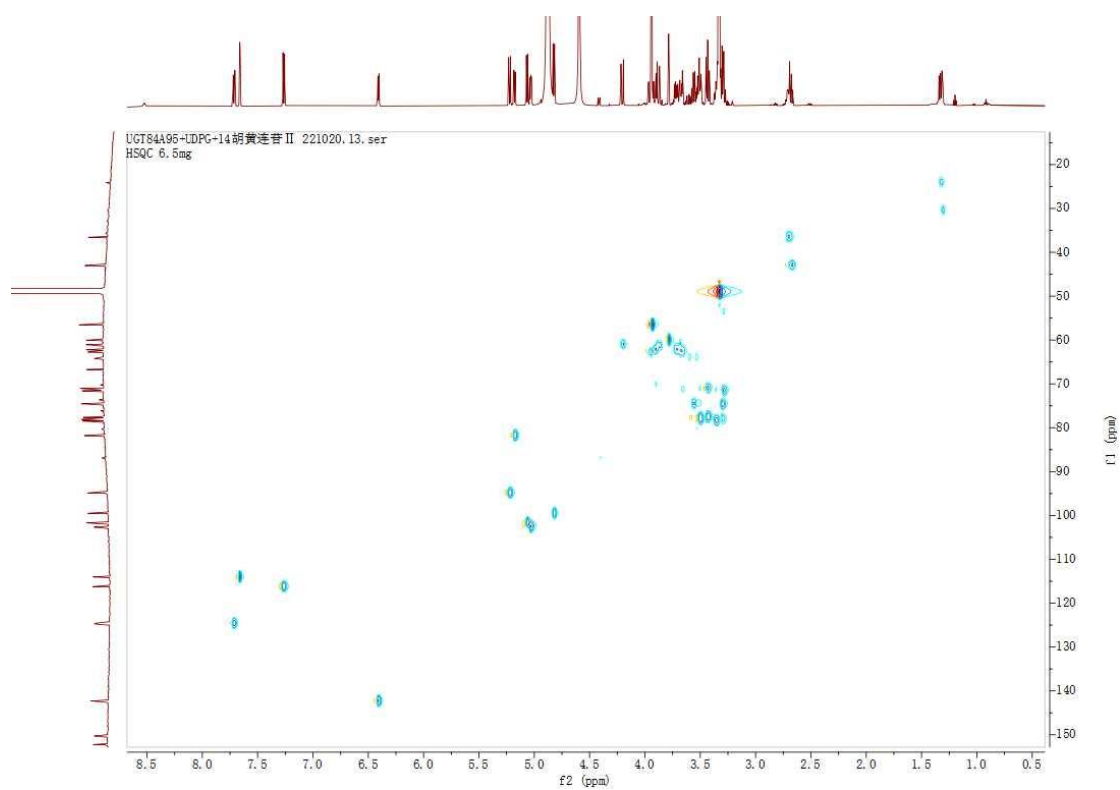

**Figure S59.** HSQC spectrum of glycosylated product **14a** ( $\text{CD}_3\text{OD}$ , 600 MHz).

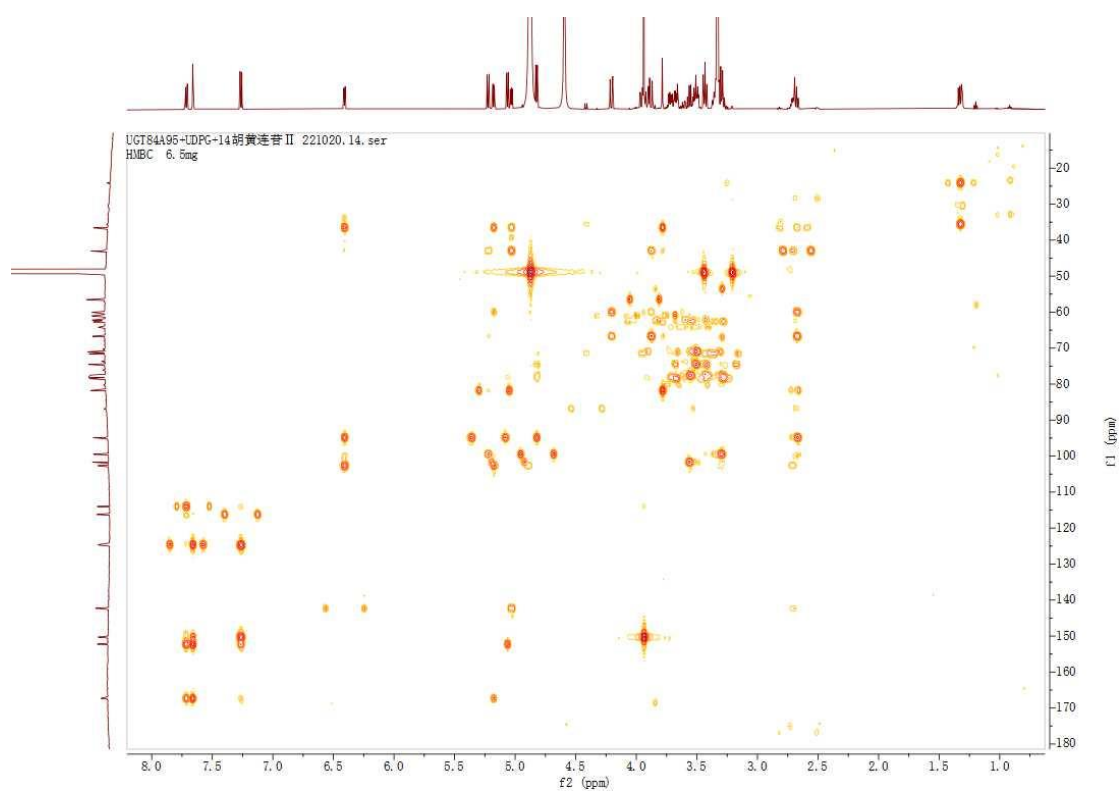

**Figure S60.** HMBC spectrum of glycosylated product **14a** ( $\text{CD}_3\text{OD}$ , 600 MHz).

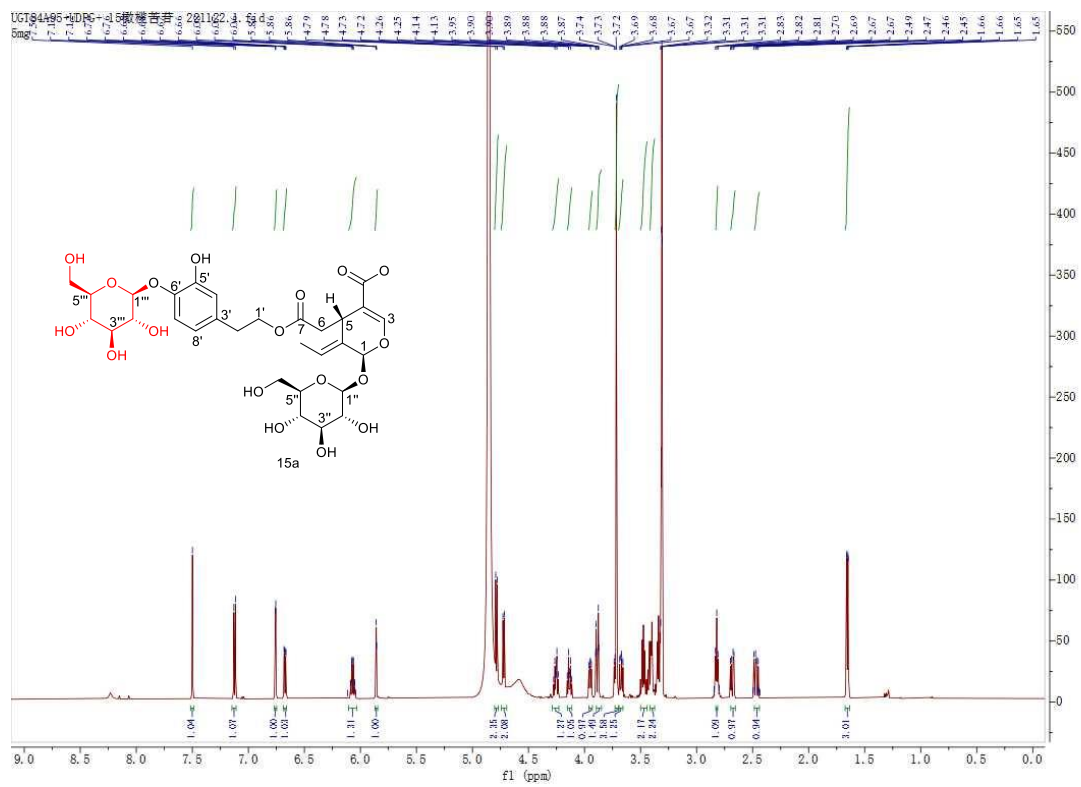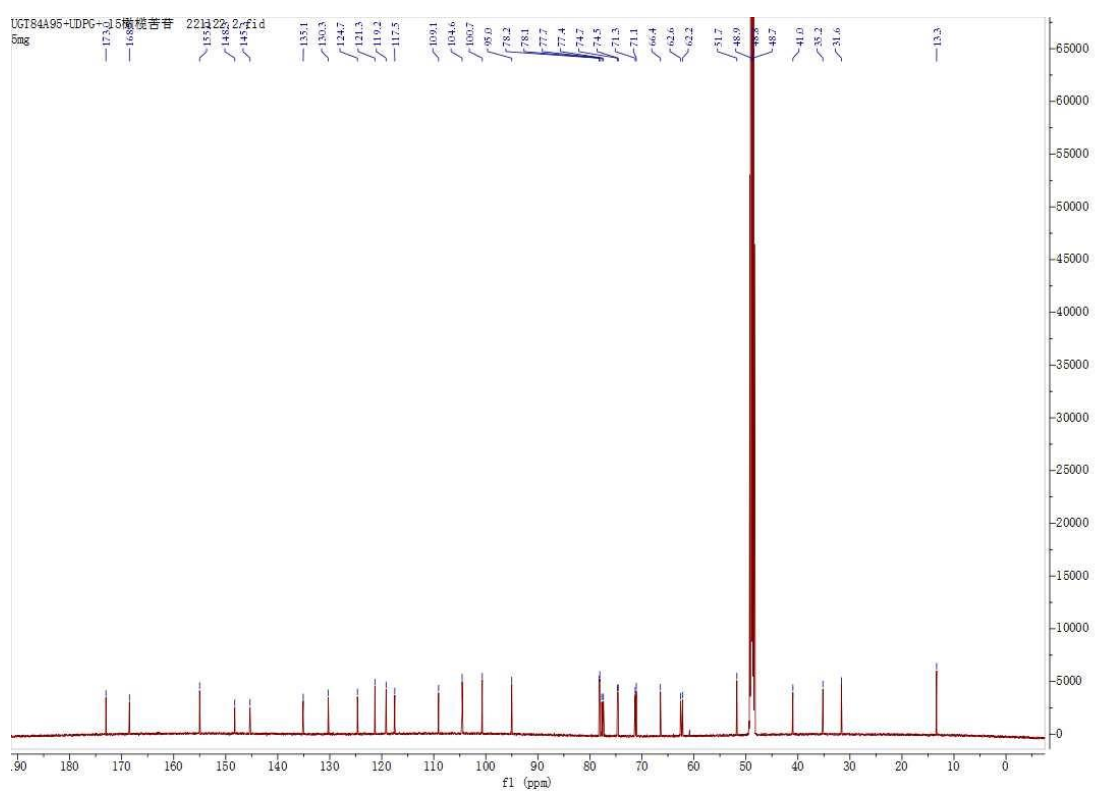

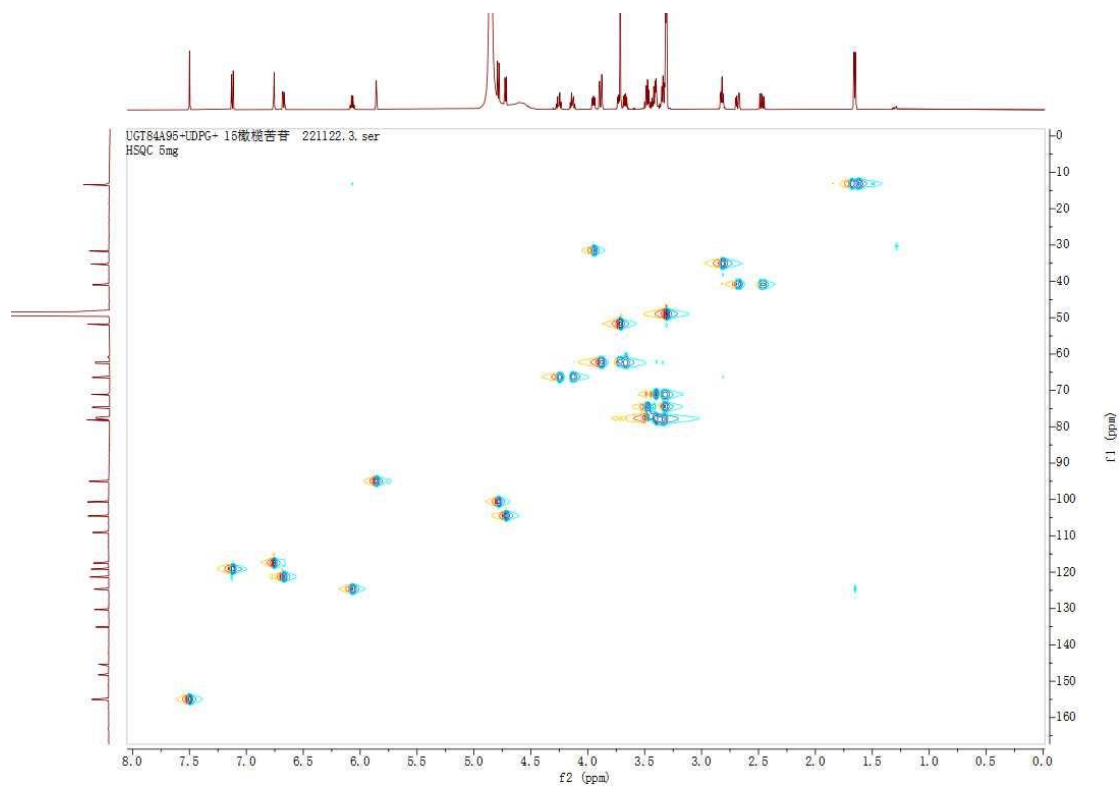

**Figure S63.** HSQC spectrum of glycosylated product **15a** (CD<sub>3</sub>OD, 600 MHz).

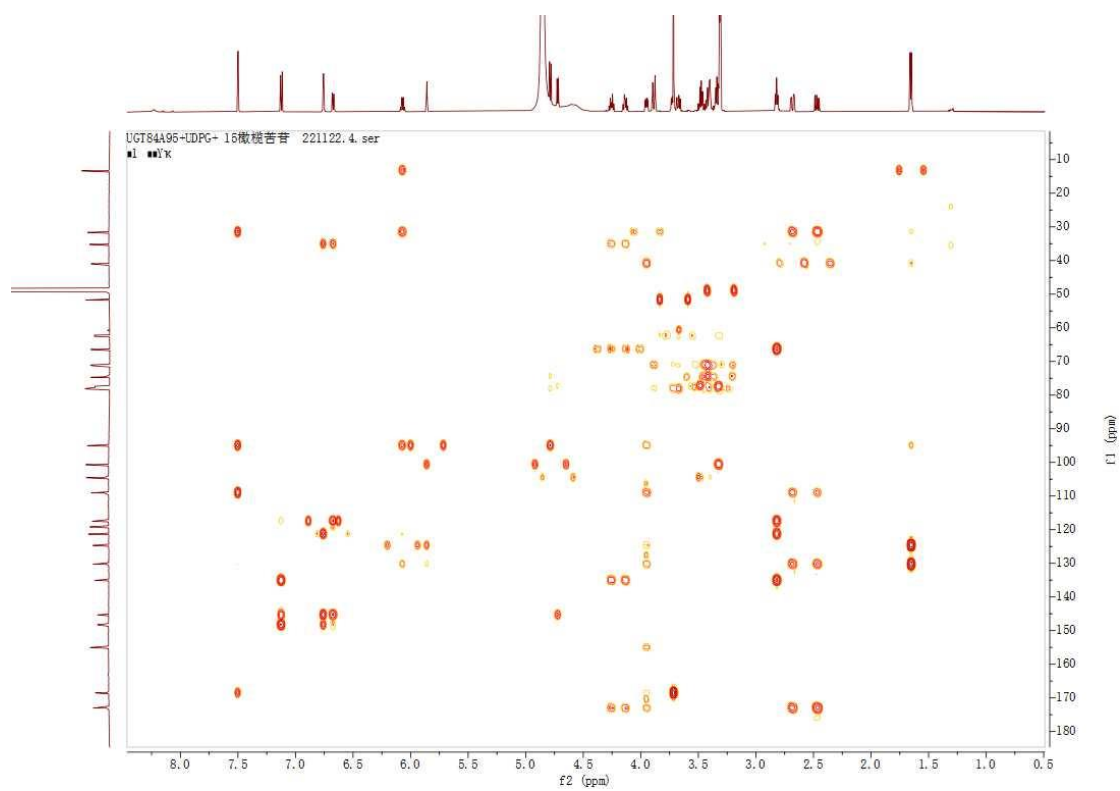

**Figure S64.** HMBC spectrum of glycosylated product **15a** (CD<sub>3</sub>OD, 600 MHz).

### 3. Supplementary Note.

>UGT84A95

ATGACCGCTGCAGAGAAAAACACATTCATGTTTTATGGTCTCATTTCCGGGGCAAGGACATGTAATCCCTCCTAAGACTG  
GGCAAGCGCCTAGCTTCTTCGGGCCTCTTCGTCACTCTTTCAGCACCCGAATTCATAGGCCAGAGCATCCGAGAAGCCACCAAA  
ATCACCAACAACGACCCCCGACTCCAATAGGCACGGGCTTCGTGAGTTTGAATCTTTGACGACGGTTGGGACCTCAACGA  
CCCCAAACGGGAAAGCCTAGACGCGTACTTAGCCCAGCTCGAGCTCATCGGTAGGCAAAGGCTACCTCAGATGATAAAAAATC  
AGGAGGAAATCGGGCGACCCGTTTCTGTCTAATCAACAACCCGTTTATTCCATGGGTATCTGACGTGGCTGAAGAATTGGGTA  
TCCCGAGTGCAATGCTTTGGGTCCAATCTTGTGCTGTTTTTCAGCTTATTATCACTACTGCAACAATCTTGTACCTTCCCTAGTG  
AAGTGAACTGAAATCGATGTTCAATTACCTTTCATGCCCTTGTGAAGTACGATGAGGTTCTAGCTTCTTGCATCCTAACACG  
CCTTACCCTTTTTTGGGGAGGGCTATTTTGGGTCAGTTCAAGAATATTTCCAAGCCTTTTTGTATACTTATGGACACTTTTGAAGA  
ACTTGAGCATGAAATTATTGATTACATGTCCAAAATTTGTCGGCCATTAAGACTATAGGTCCATTGTTTCATGACTAGTAAGGTTG  
TTGATTCCAATTCGAAAAACGAAATTCGGGGGATATTTTACGGCAGAGAATTGCAAGGAGTGTTGGACTCGAAACCGGA  
GGGAACGGTGGTGTACATTCGTTTGGTAGTATTGTACAGTTGAAACAAGAGCAAGTAAATGAGATTGCGCACGGGCTTTTGG  
CGGCCGAGGTTTCCTTTTTATGGTTTTGAGGCCACCGCCTAAAGAAAAGATCACTCTTGACCCACATGTGTTGCCGGACCGGT  
TCCTTGAGAAAGCTGGGGAGAGAGGGAAGATAGTGAAGTGGAGCCACAAGAGGAGGTGTTGGCCACCTTCGACGGCGT  
GTTTTCTGACGCACTGTGGATGGAATTCGACGATGGAGGCGTTGACAAGTGGCGTTCGGTATTGGCTTTTCTCAGTGGGGG  
GATCAGGTGACGGATGCTAAGTTTTTGGTTGATGTTTTAAGATTGGGATTAGGATGTGTAGAGGTGAAGCTGAGGGGAGGAT  
TGTGTCACGTGAGGAGGTGGAGAGGTGTTGAGAGCCGCGTTAGTGGTCCCAGGCAGCGGAGTTGAAGGCCAATGCAAT  
GAAGTGAAGAAAGTGGCGGAGGAGCGGTGGCGGAGGGTGGTTCGTCTAGGAATATGCAAAATTTGTAGATCAAATT  
GTCCGGATAGGAACCGATCATACAATAATCTAG



#### 4. References

1. S. Lunkenbein, M. Bellido, A. Aharoni, E. M. Salentijn, R. Kaldenhoff, H. A. Coirer, J. Muñoz-Blanco and W. Schwab, *Plant physiology*, 2006, **140**, 1047-1058.
2. D. Hall and V. De Luca, *Plant J.*, 2007, **49**, 579-591.
3. Q. Ye, S. Zhang, N. Qiu, L. Liu, W. Wang, Q. Xie, Q. Chang and Q. Chen, *Molecules*, 2021, **26**, 4650.
4. N. N. Ono, X. Qin, A. E. Wilson, G. Li and L. Tian, *PloS one*, 2016, **11**, e0156319.
5. N. Okitsu, K. Matsui, M. Horikawa, K. Sugahara and Y. Tanaka, *Plant & cell physiology*, 2018, **59**, 2075-2085.
6. Y. Y. Chen, Z. S. Xu and A. S. Xiong, *PloS one*, 2016, **11**, e0154938
7. Y. Zhang, K. Xie, A. Liu, R. Chen, D. Chen, L. Yang and J. Dai, *Chinese Chemical Letters*, 2019, **30**, 443-446.
8. N. Sasaki, Y. Nishizaki, E. Yamada, F. Tatsuzawa, T. Nakatsuka, H. Takahashi and M. Nishihara, *FEBS lett.*, 2015, **589**, 182-187.
9. J. Isayenkova, V. Wray, M. Nimtz, D. Strack and T. Vogt, *Phytochemistry*, 2006, **67**, 1598-1612.
10. L. V. Modolo, J. W. Blount, L. Achnine, M. A. Naoumkina, X. Wang and R. A. Dixon, *Plant Mol. Biol.*, 2007, **64**, 499-518.
11. K. Chen, Z. M. Hu, W. Song, Z. L. Wang, J. B. He, X. M. Shi, Q. H. Cui, X. Qiao and M. Ye, *ACS synthetic biology*, 2019, **8**, 1858-1866.
12. O. A. Adiji, M. L. Docampo-Palacios, A. Alvarez-Hernandez, G. M. Pasinetti, X. Wang and R. A. Dixon, *Plant physiology*, 2021, **185**, 1617-1637.
13. Y. Matsuba, Y. Okuda, Y. Abe, Y. Kitamura, K. Terasaka, H. Mizukami, H. Kamakura, N. Kawahara, Y. Goda, N. Sasaki and Y. Ozeki, *Plant Biotechnology*, 2008, **25**, 369-375.
14. J. Mittasch, S. Mikolajewski, F. Breuer, D. Strack and C. Milkowski, *Theoretische und angewandte Genetik*, 2010, **120**, 1485-1500.
15. B. Messner, O. Thulke and A. R. Schöffner, *Planta*, 2003, **217**, 138-146.
16. K. Mashima, M. Hatano, H. Suzuki, M. Shimosaka and G. Taguchi, *Plant & cell physiology*, 2019, **60**, 2733-2743.
17. Y. Aoi, H. Hira, Y. Hayakawa, H. Liu, K. Fukui, X. Dai, K. Tanaka, K. I. Hayashi, Y. Zhao and H. Kasahara, *Biochemical and biophysical research communications*, 2020, **532**, 244-250.
18. S. Tárraga, P. Lisón, M. P. López-Gresa, C. Torres, I. Rodrigo, J. M. Bellés and V. Conejero, *Journal of experimental botany*, 2010, **61**, 4325-4338.
19. H. I. Lee and I. Raskin, *J. Biol. Chem.*, 1999, **274**, 36637-36642.
20. A. M. George Thompson, C. V. Iancu, K. E. Neet, J. V. Dean and J. Y. Choe, *Scientific reports*, 2017, **7**, DOI: 10.1038/srep46629.
21. X. Yan, Y. Fan, W. Wei, P. Wang, Q. Liu, Y. Wei, L. Zhang, G. Zhao, J. Yue and Z. Zhou, *Cell research*, 2014, **24**, 770-773.
22. D. Meesapyodsuk, J. Balsevich, D. W. Reed and P. S. Covello, *Plant physiology*, 2007, **143**, 959-969.
23. J. B. Szerszen, K. Szczyglowski and R. S. Bandurski, *Science*, 1994, **265**, 1699-1701.
24. A. Owatworakit, B. Townsend, T. Louveau, H. Jenner, M. Rejzek, R. K. Hughes, G. Saalbach, X. Qi, S. Bakht, A. D. Roy, S. T. Mugford, R. J. Goss, R. A. Field and A. Osbourn, *J. Biol. Chem.*, 2013, **288**, 3696-3704.
25. K. M. Wetterhorn, S. A. Newmister, R. K. Caniza, M. Busman, S. P. McCormick, F. Berthiller, G. Adam and I. Rayment, *Biochemistry*, 2016, **55**, 6175-6186.
26. W. Schweiger, J. Boddu, S. Shin, B. Poppenberger, F. Berthiller, M. Lemmens, G. J. Muehlbauer and G. Adam, *Molecular plant-microbe interactions*, 2010, **23**, 977-986.
27. Y. Zhao, W. Li, L. Sun, H. Xu, W. Su, F. Xue, R. Wu and C. Lu, *Pesticide biochemistry and physiology*, 2022, **183**, 105057.
28. A. R. Moraga, A. T. Mozos, O. Ahrazem and L. Gómez-Gómez, *BMC plant biology*, 2009, **9**, 109.

29. C. M. Gachon, M. Langlois-Meurinne, Y. Henry and P. Saindrenan, *Plant Mol. Biol.*, 2005, **58**, 229-245.
30. T. T. Chen, F. F. Liu, D. W. Xiao, X. Y. Jiang, P. Li, S. M. Zhao, B. K. Hou and Y. J. Li, *Plant Mol. Biol.*, 2020, **102**, 389-401.
